# Supplementary material for: The Distribution and Biogenic Origins of Zinc in the Mineralised Tooth Tissues of Modern and Fossil Hominoids: Implications for Life History, Diet and Taphonomy
Source: MDPI journal article supplement (doi:10.3390/biology12121455), 2023-11-21
Supplement: s1 [file s1]

Quantitative assessment of Zn in the outer enamel surface in relation to total enamel thickness

Dean et al. *Biology*

# Outline

|                              |    |
|------------------------------|----|
| Methods .....                | 3  |
| Zinc maps and ROIs           |    |
| Modern deciduous teeth ..... | 4  |
| Modern permanent teeth ..... | 16 |
| Fossil deciduous teeth ..... | 22 |
| Fossil permanent teeth ..... | 25 |

# Methods

For each specimen, the Zn map was recorded as a 32-bit tiff file in Geopixe for Proposals I-20160686 and I-20180047 (Maia detector), and in HDIP for Proposals I-20190203 and I-20210133 (Vortex EM silicon drift detectors).

The Zn map was then opened in ImageJ (version 1.53t), the image scale was set according to the scan resolution (e.g., 1 pixel equals 10  $\mu\text{m}$ ), and the contrast and brightness adjusted to best visualize the Zn variations.

Then for each of the enamel areas of interest (cuspal, mid-lateral and cervical), a segmented line going in the direction of the prisms was drawn from beyond the enamel-dentine junction (EDJ) in the dentine, to in the air, beyond the outer enamel surface (OES). To make sure the ROIs respect the direction of the prisms, the line started deeper in the dentine than the EDJ, and ended in the air, beyond the OES.

These 3 regions of interest (ROIs) were saved using the ROI manager, and an image (see below) was saved as a record. The raw data along the 3 ROIs were saved as a csv file, and a multiplot was drawn and saved as a pdf for easy visualization of the data and detection of mistakes.

For relative enamel thickness, the measurements were restricted to start from the EDJ and end on the OES, and Zn contents were plotted against a percentage of distance from the EDJ (0%) to the OES (100%).

Summary graphs were then build in Excel by compiling the raw data of all specimens.

From the subset of values for relative enamel thickness, the maximum Zn value (Zn peak) was computed in Excel, as well as the width of the Zn-enriched band, the distance between “take-off” and the Zn peak, and the distance between the Zn peak and the OES, all in relation to total enamel thickness (absolute and relative [percentage] values reported hereafter).

**Table - Descriptive statistics in enamel thickness, maximal Zn concentration (peak) and width of the Zn-enriched band of enamel in the three anatomical regions (cuspal, mid-lateral, and cervical).**

|                    | <b>Enamel thickness [μm]</b>                          | <b>Zn peak (ppm)</b>                                  | <b>Width of Zn-enriched band (μm)</b>               |
|--------------------|-------------------------------------------------------|-------------------------------------------------------|-----------------------------------------------------|
| <b>Cuspal</b>      | Min = 44<br>Max = 2820<br>Mean = 962.2<br>SD = 614.1  | Min = 434<br>Max = 1743<br>Mean = 879.2<br>SD = 334.3 | Min = 16<br>Max = 950<br>Mean = 388.7<br>SD = 219.6 |
| <b>Mid-lateral</b> | Min = 38<br>Max = 1970<br>Mean = 806.28<br>SD = 484.1 | Min = 197<br>Max = 1717<br>Mean = 915.9<br>SD = 412.4 | Min = 17<br>Max = 950<br>Mean = 412.9<br>SD = 203.6 |
| <b>Cervical</b>    | Min = 14<br>Max = 840<br>Mean = 370.4<br>SD = 208.8   | Min = 393<br>Max = 1602<br>Mean = 821.6<br>SD = 351.3 | Min = 13<br>Max = 560<br>Mean = 272.2<br>SD = 123.5 |
| <b>Overall</b>     | Min = 14 (cervical)<br>Max = 2820 (cuspal)            | Min = 197 (mid-lateral)<br>Max = 1743 (cuspal)        | Min = 13 (cervical)<br>Max = 950 (cuspal)           |

|             | Enamel thickness [μm] | Zn peak (ppm) | Zn peak width (μm [%]) |
|-------------|-----------------------|---------------|------------------------|
| Cuspal      | 1120                  | 896           | 400 [35.7%]            |
| Mid-lateral | 910                   | 872           | 490 [53.8%]            |
| Cervical    | 330                   | 798           | 320 [97.0%]            |

|             | "Take-off" to Zn peak (μm [%]) | Zn peak to OES (μm [%]) |
|-------------|--------------------------------|-------------------------|
| Cuspal      | 360 [32.1%]                    | 40 [3.6%]               |
| Mid-lateral | 440 [48.4%]                    | 50 [5.5%]               |
| Cervical    | 300 [90.9%]                    | 20 [6.1%]               |

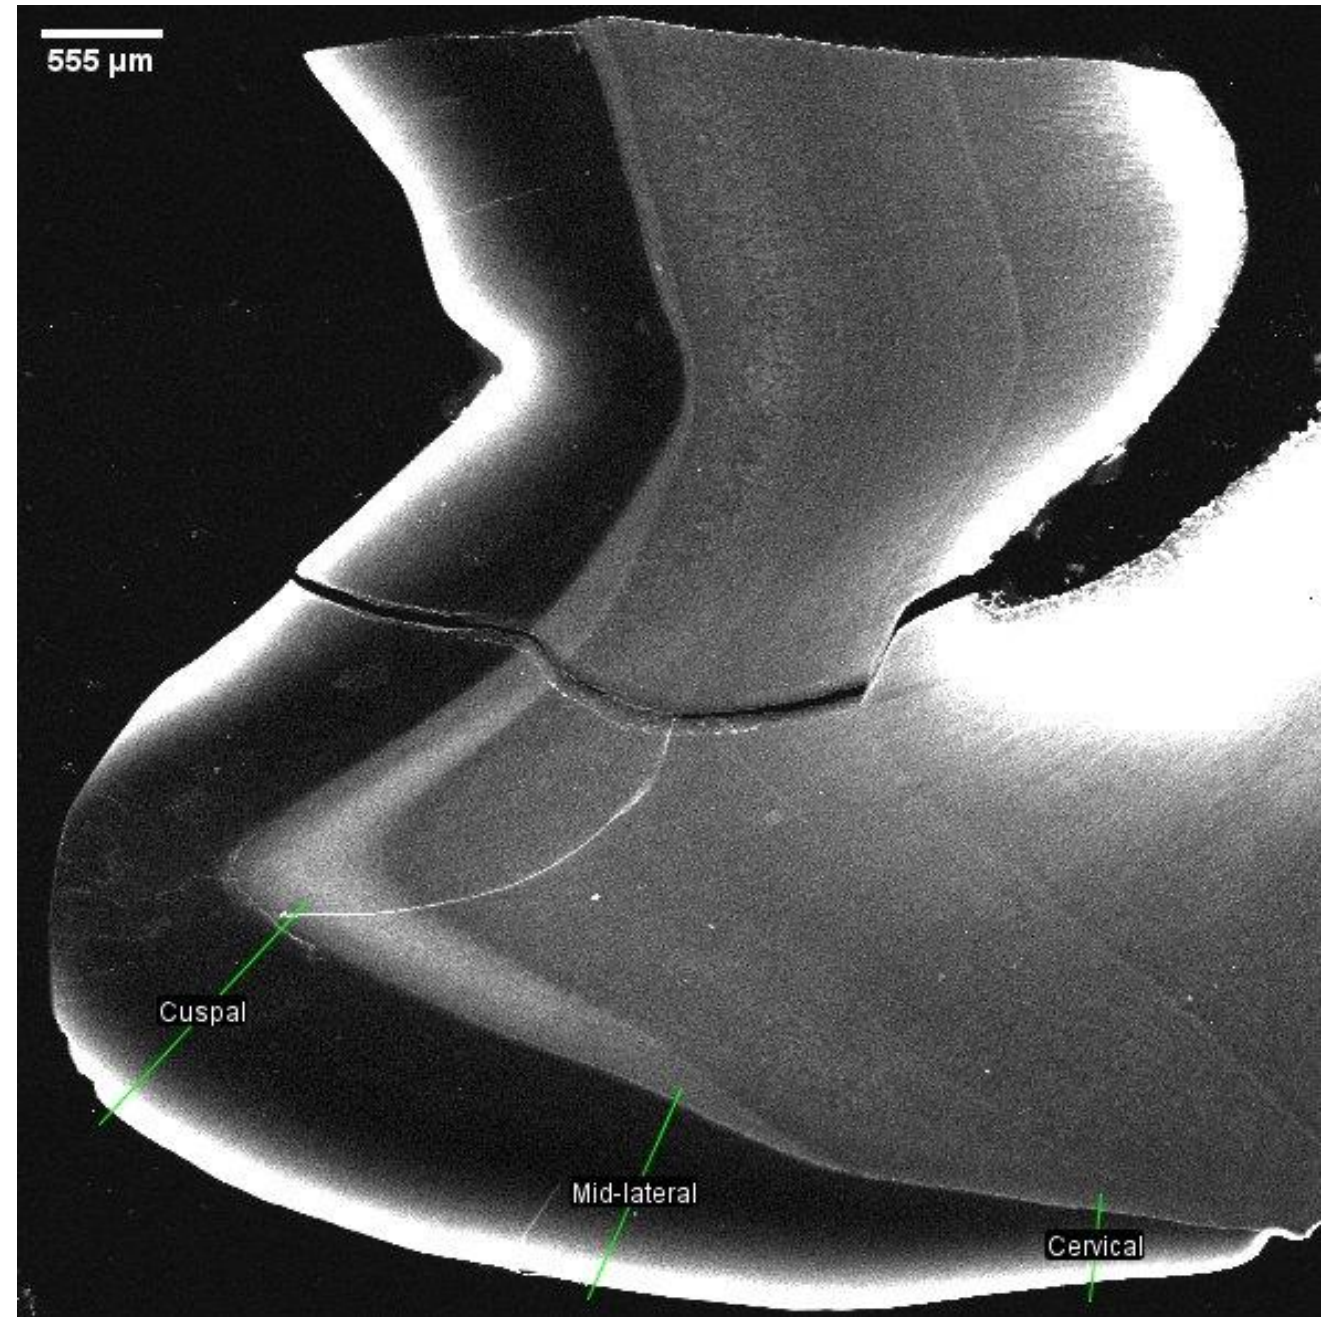

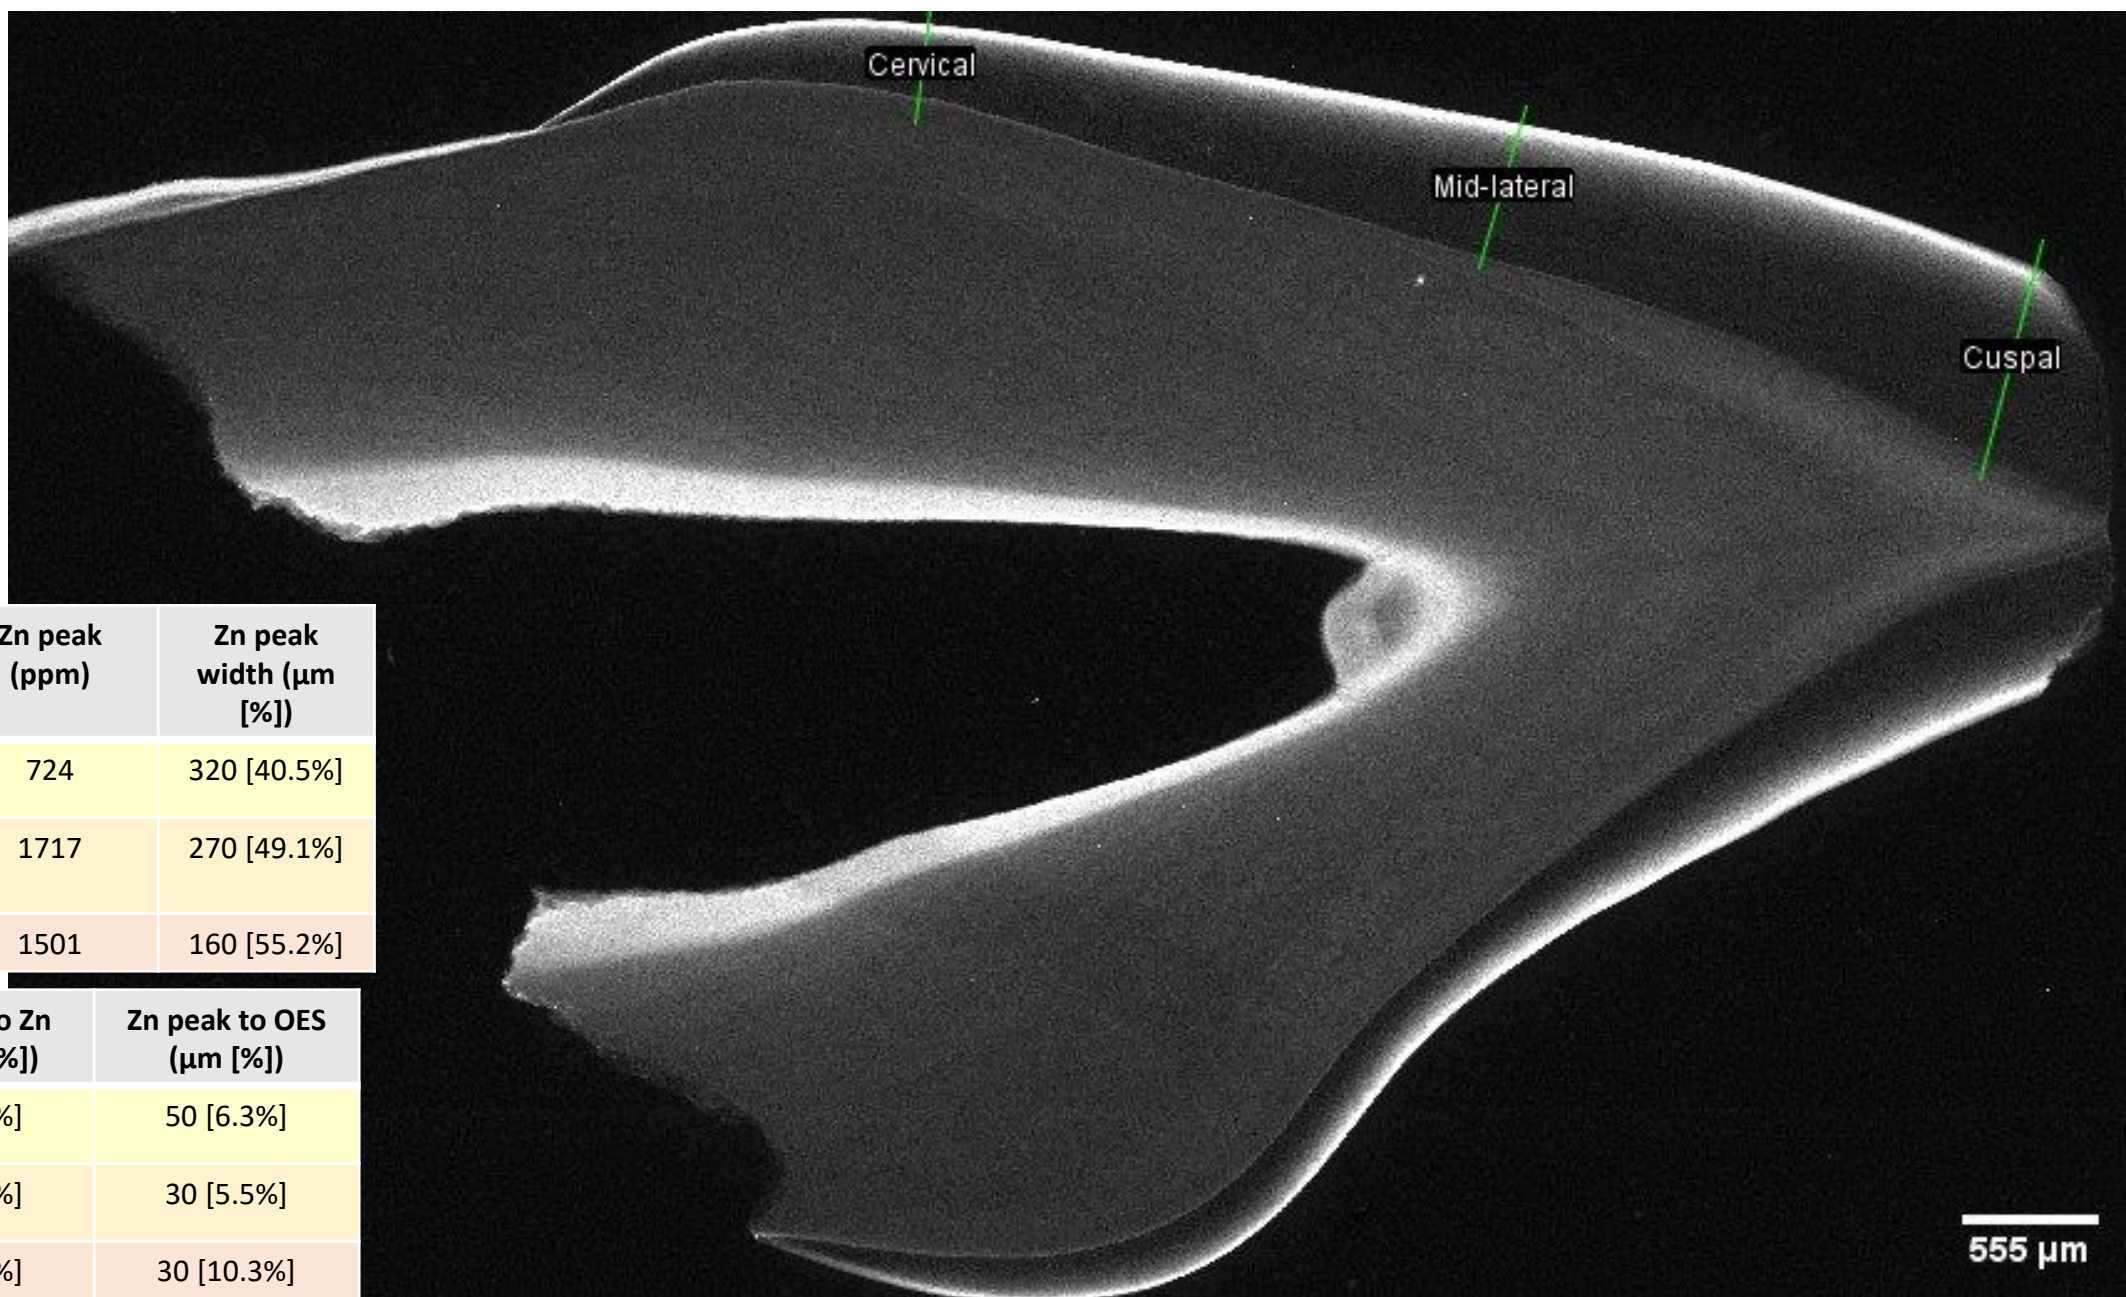

|             | Enamel thickness [μm] | Zn peak (ppm) | Zn peak width (μm [%]) |
|-------------|-----------------------|---------------|------------------------|
| Cuspal      | 790                   | 724           | 320 [40.5%]            |
| Mid-lateral | 550                   | 1717          | 270 [49.1%]            |
| Cervical    | 290                   | 1501          | 160 [55.2%]            |

|             | “Take-off” to Zn peak (μm [%]) | Zn peak to OES (μm [%]) |
|-------------|--------------------------------|-------------------------|
| Cuspal      | 270 [34.2%]                    | 50 [6.3%]               |
| Mid-lateral | 240 [43.6%]                    | 30 [5.5%]               |
| Cervical    | 130 [44.8%]                    | 30 [10.3%]              |

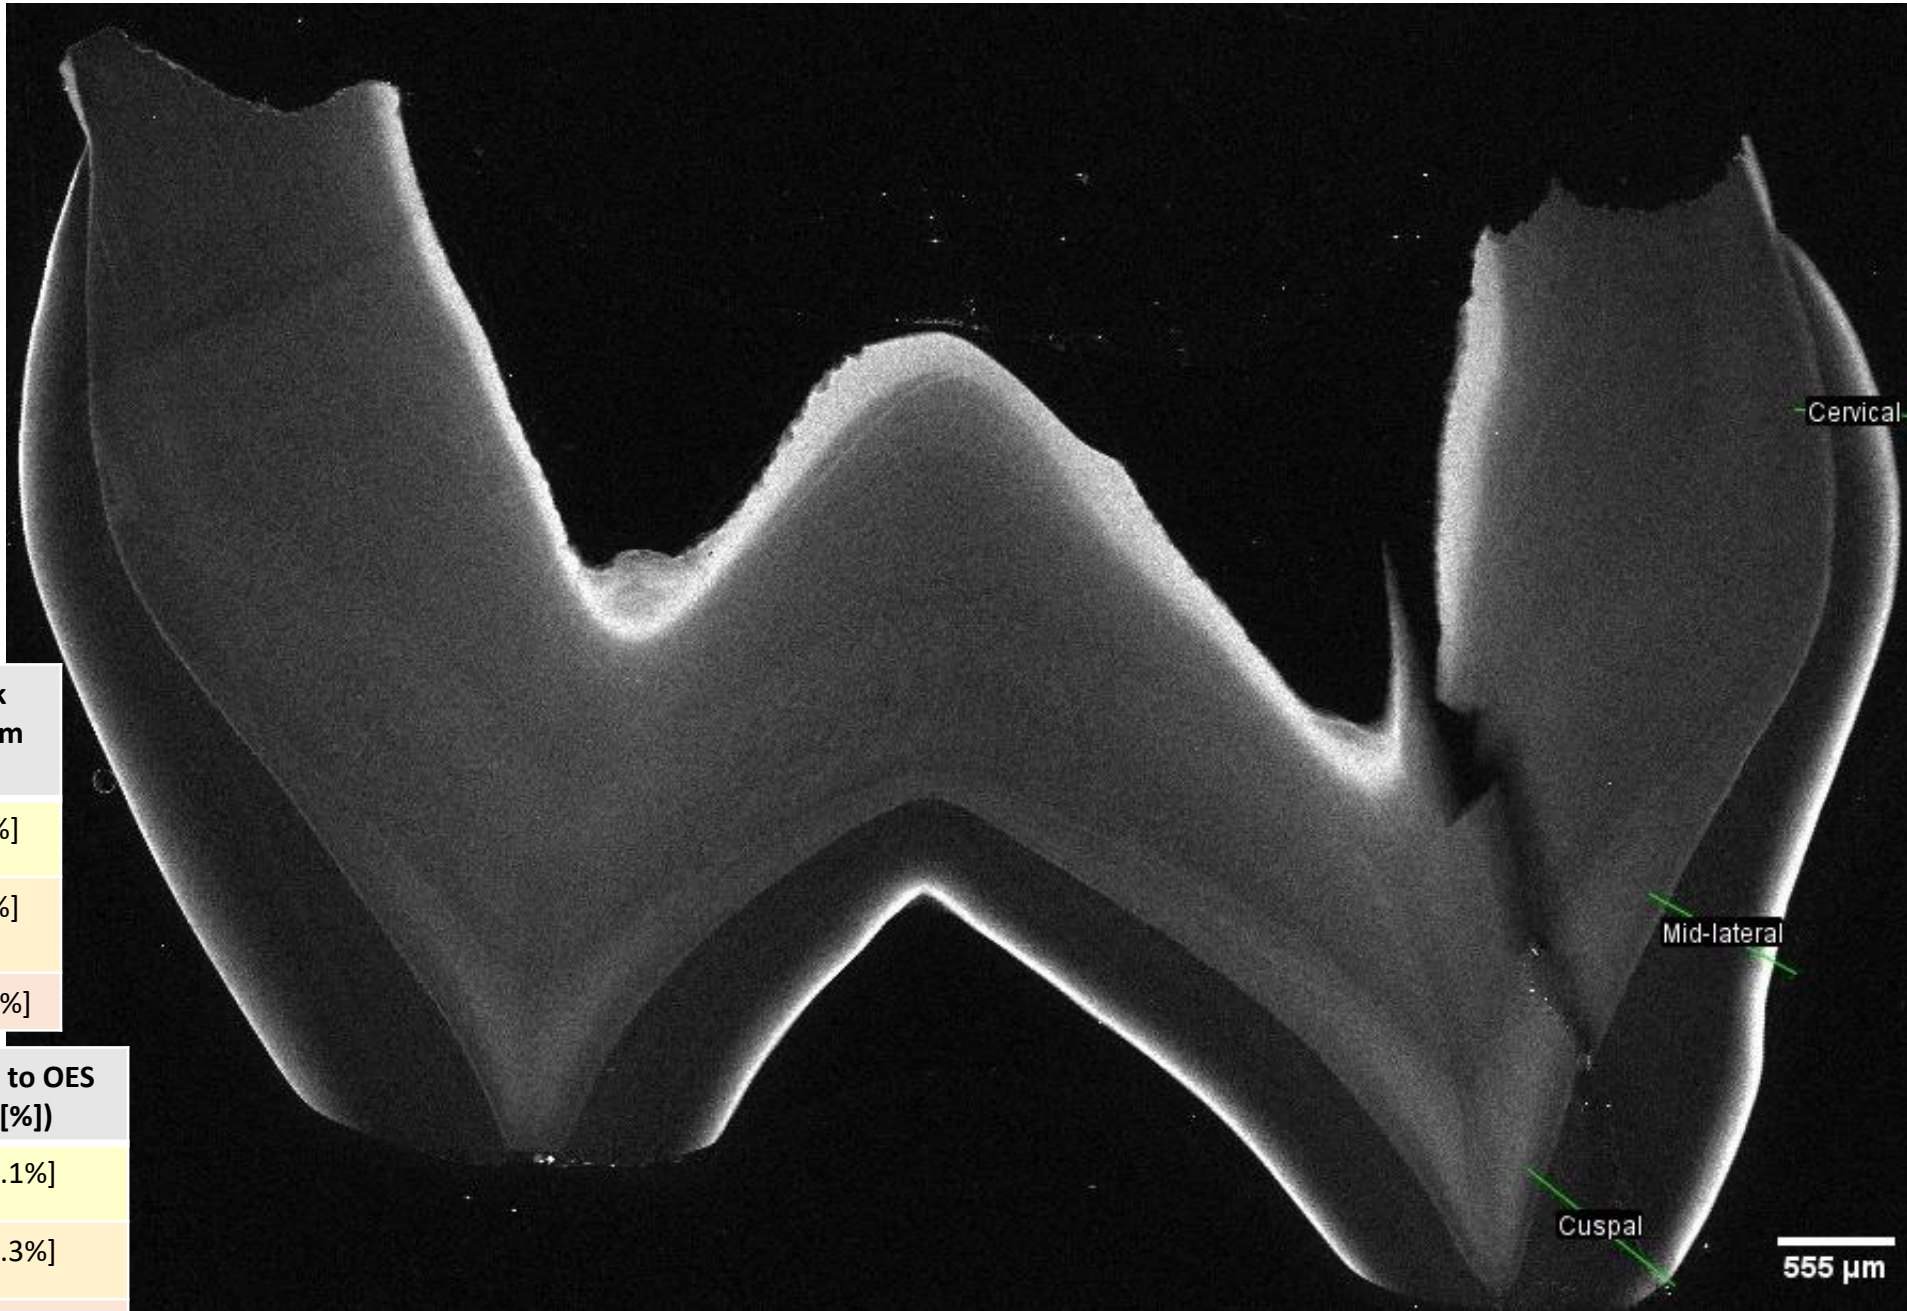

|             | Enamel thickness [ $\mu\text{m}$ ] | Zn peak (ppm) | Zn peak width ( $\mu\text{m}$ [%]) |
|-------------|------------------------------------|---------------|------------------------------------|
| Cuspal      | 740                                | 451           | 200 [27%]                          |
| Mid-lateral | 480                                | 313           | 240 [50%]                          |
| Cervical    | 270                                | 574           | 210 [77.8%]                        |

|             | "Take-off" to Zn peak ( $\mu\text{m}$ [%]) | Zn peak to OES ( $\mu\text{m}$ [%]) |
|-------------|--------------------------------------------|-------------------------------------|
| Cuspal      | 170 [23%]                                  | 30 [4.1%]                           |
| Mid-lateral | 200 [41.7%]                                | 40 [8.3%]                           |
| Cervical    | 160 [59.3%]                                | 50 [18.5%]                          |

555  $\mu\text{m}$

|             | Enamel thickness [ $\mu\text{m}$ ] | Zn peak (ppm) | Zn peak width ( $\mu\text{m}$ [%]) |
|-------------|------------------------------------|---------------|------------------------------------|
| Cuspal      | 870                                | 1050          | 380 [43.7%]                        |
| Mid-lateral | 600                                | 1289          | 320 [53.3%]                        |
| Cervical    | 250                                | 1179          | 230 [92%]                          |

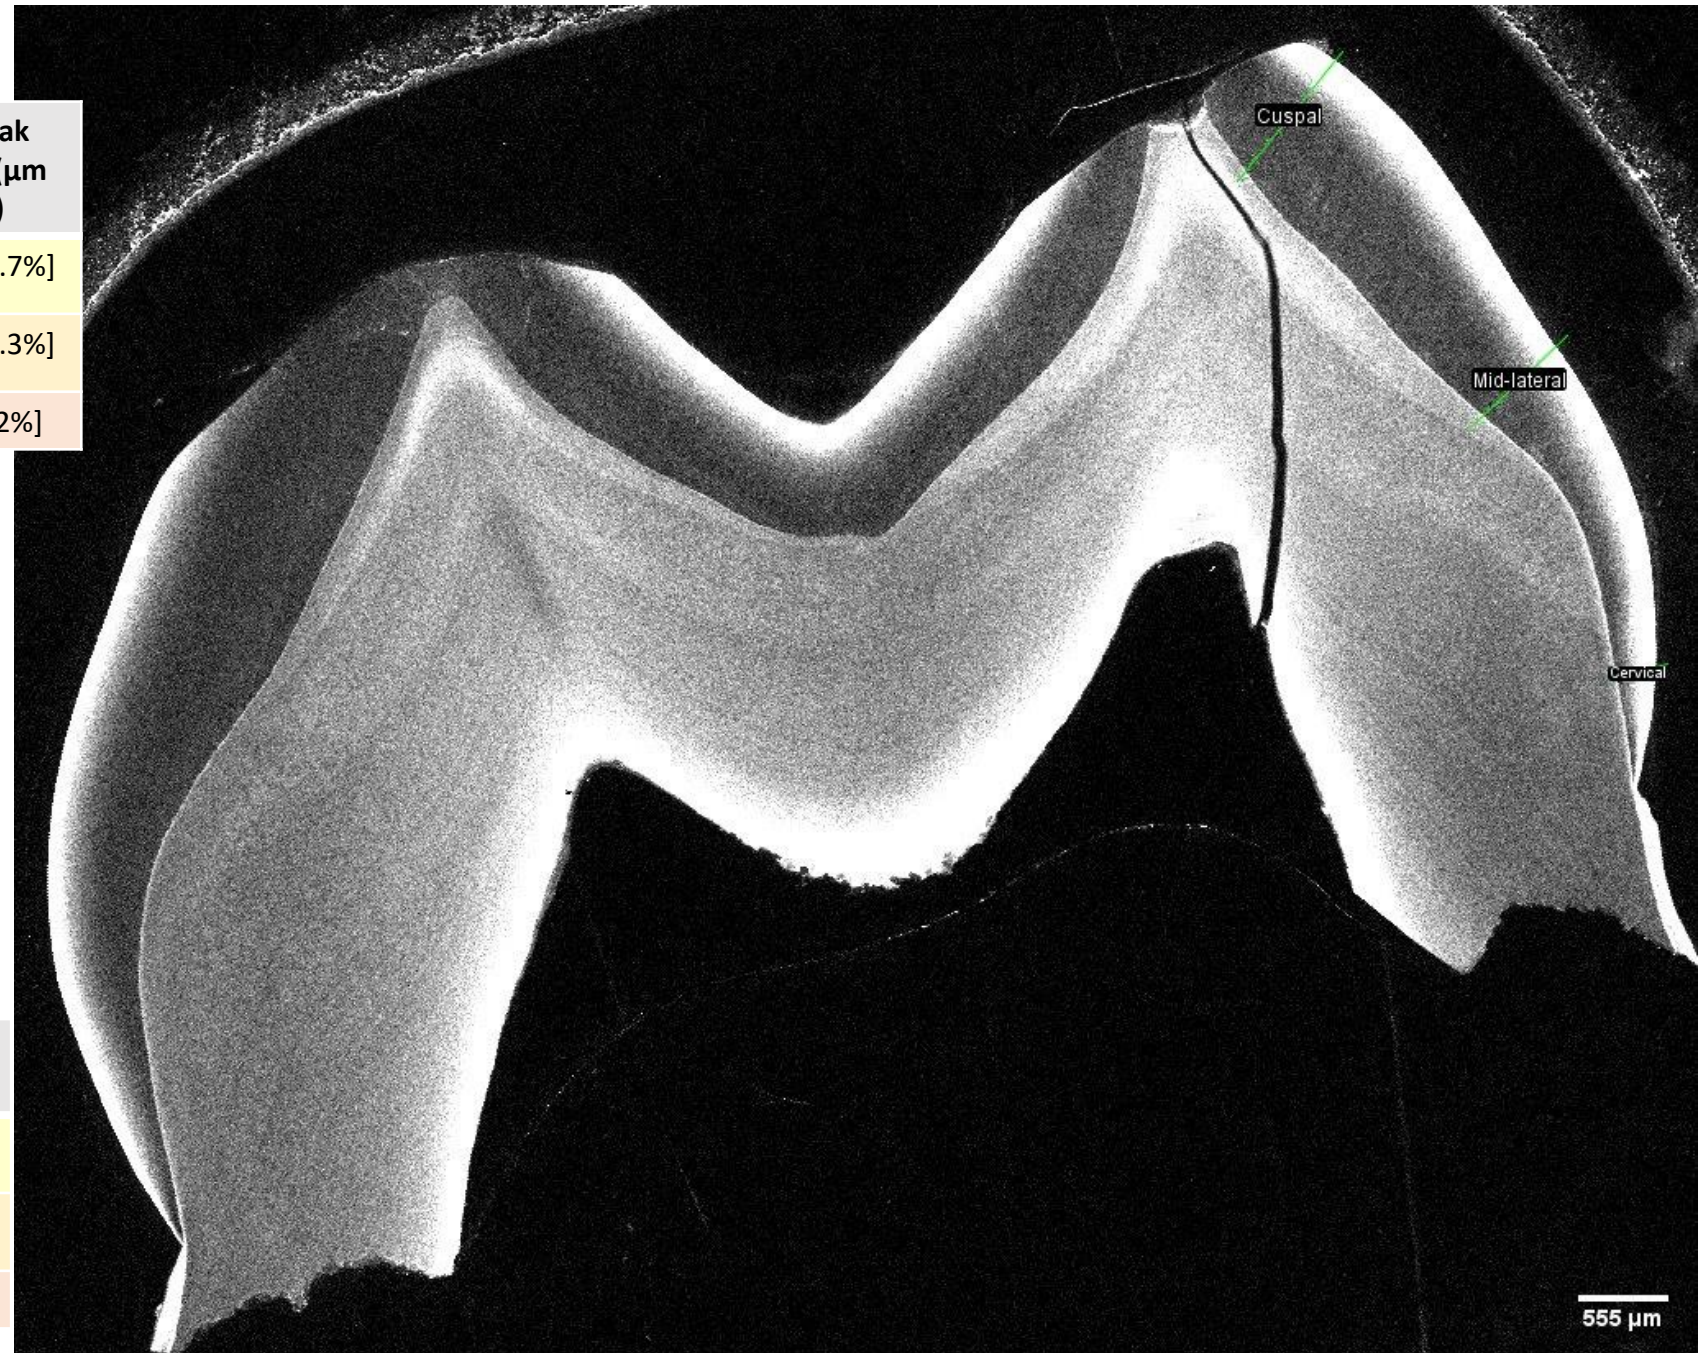

|             | "Take-off" to Zn peak ( $\mu\text{m}$ [%]) | Zn peak to OES ( $\mu\text{m}$ [%]) |
|-------------|--------------------------------------------|-------------------------------------|
| Cuspal      | 350 [40.2%]                                | 30 [3.4%]                           |
| Mid-lateral | 300 [50%]                                  | 20 [3.3%]                           |
| Cervical    | 200 [80%]                                  | 30 [12%]                            |

555  $\mu\text{m}$



|             | Enamel thickness [ $\mu\text{m}$ ] | Zn peak (ppm) | Zn peak width ( $\mu\text{m}$ [%]) |
|-------------|------------------------------------|---------------|------------------------------------|
| Cuspal      | 735                                | 904           | 345 [46.9%]                        |
| Mid-lateral | 795                                | 1314          | 375 [47.2%]                        |
| Cervical    | 240                                | 1002          | 210 [87.5%]                        |

|             | "Take-off" to Zn peak ( $\mu\text{m}$ [%]) | Zn peak to OES ( $\mu\text{m}$ [%]) |
|-------------|--------------------------------------------|-------------------------------------|
| Cuspal      | 315 [42.9%]                                | 30 [4.1%]                           |
| Mid-lateral | 315 [39.6%]                                | 60 [7.5%]                           |
| Cervical    | 165 [68.8%]                                | 45 [18.8%]                          |

N.B.: The horizontal grey line is a scanning artifact: a few lines of data are missing, but this does not affect the measurements.

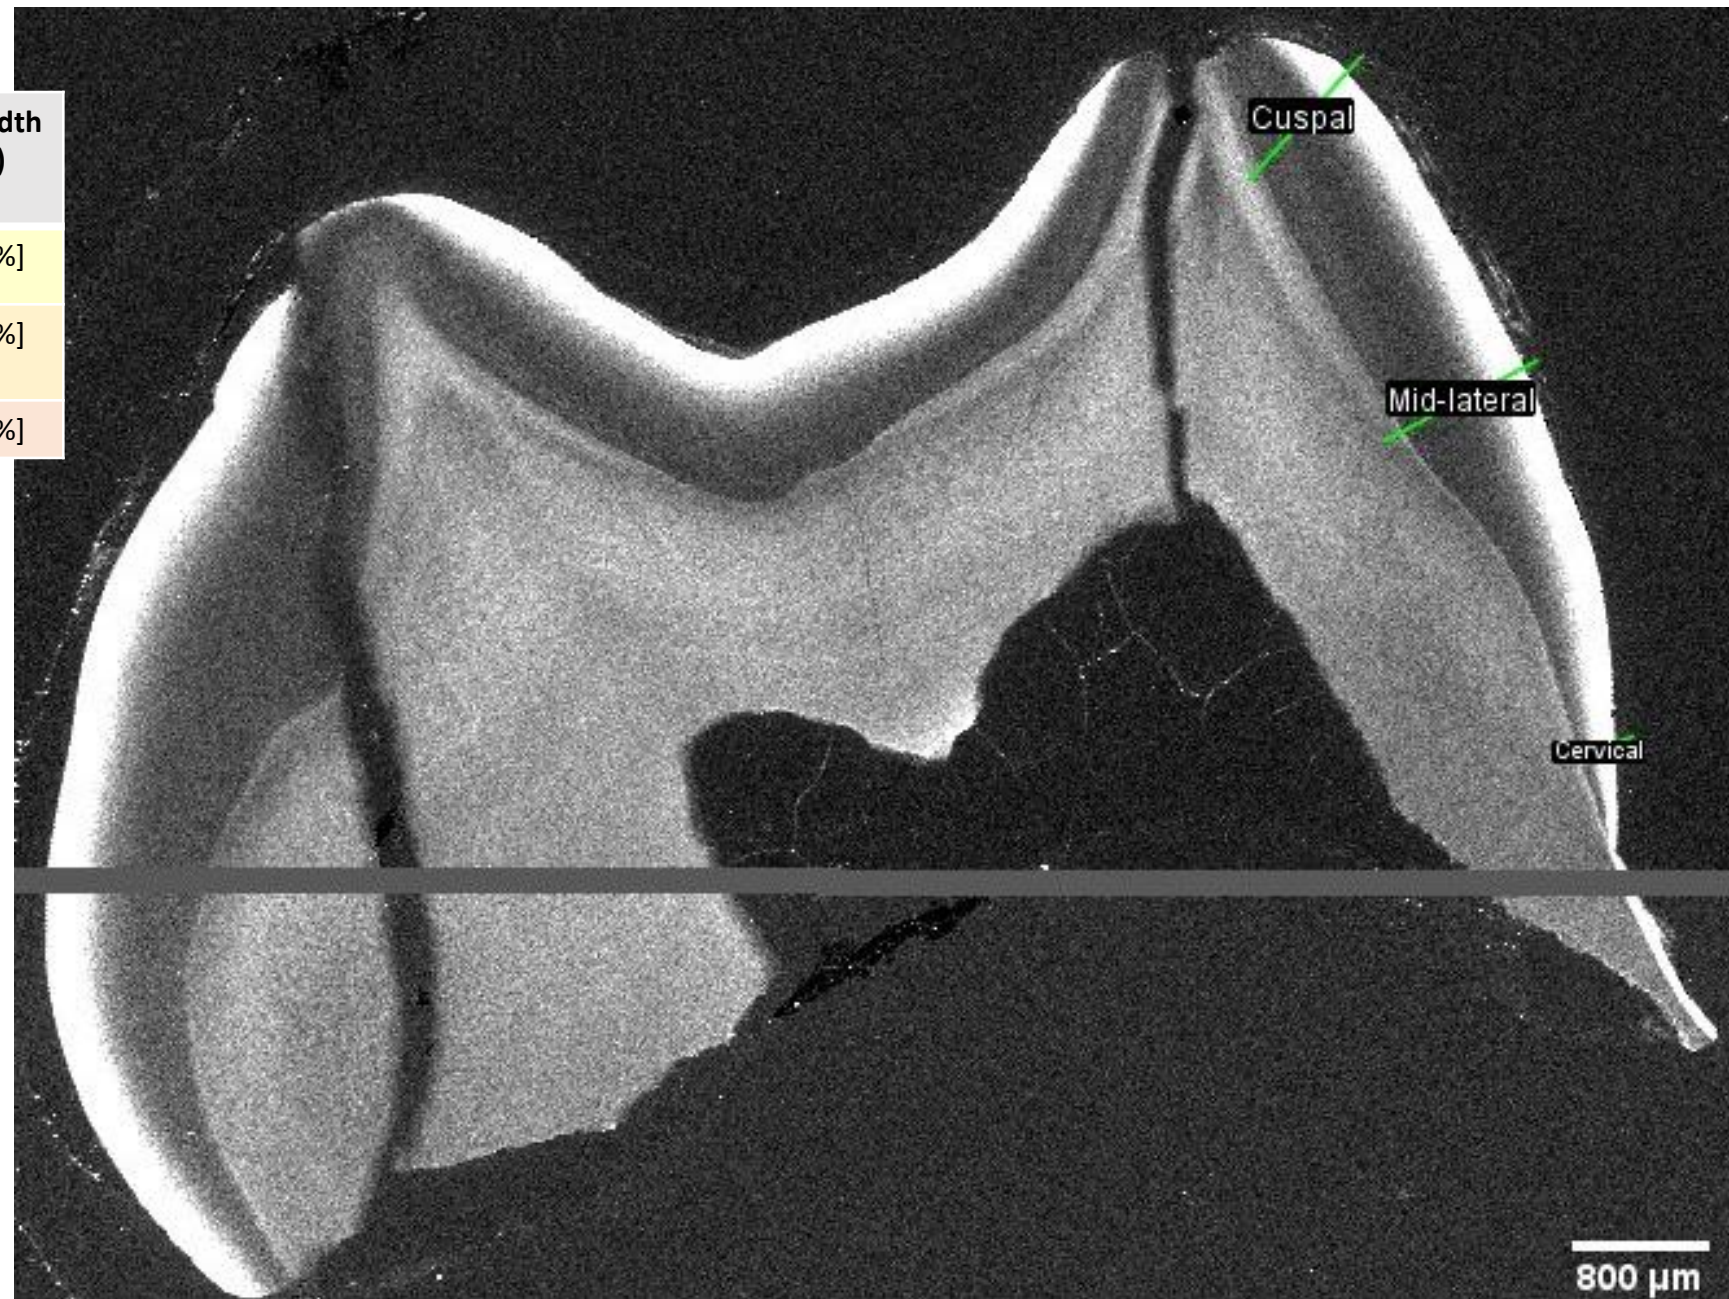

|             | Enamel thickness [ $\mu\text{m}$ ] | Zn peak (ppm) | Zn peak width ( $\mu\text{m}$ [%]) |
|-------------|------------------------------------|---------------|------------------------------------|
| Cuspal      | 49                                 | 1320          | 17 [34.7%]                         |
| Mid-lateral | 38                                 | 1437          | 18 [47.4%]                         |
| Cervical    | 20                                 | 1140          | 15 [75%]                           |

|             | "Take-off" to Zn peak ( $\mu\text{m}$ [%]) | Zn peak to OES ( $\mu\text{m}$ [%]) |
|-------------|--------------------------------------------|-------------------------------------|
| Cuspal      | 14 [28.6%]                                 | 3 [6.1%]                            |
| Mid-lateral | 15 [39.5%]                                 | 3 [7.9%]                            |
| Cervical    | 14 [70%]                                   | 1 [5%]                              |

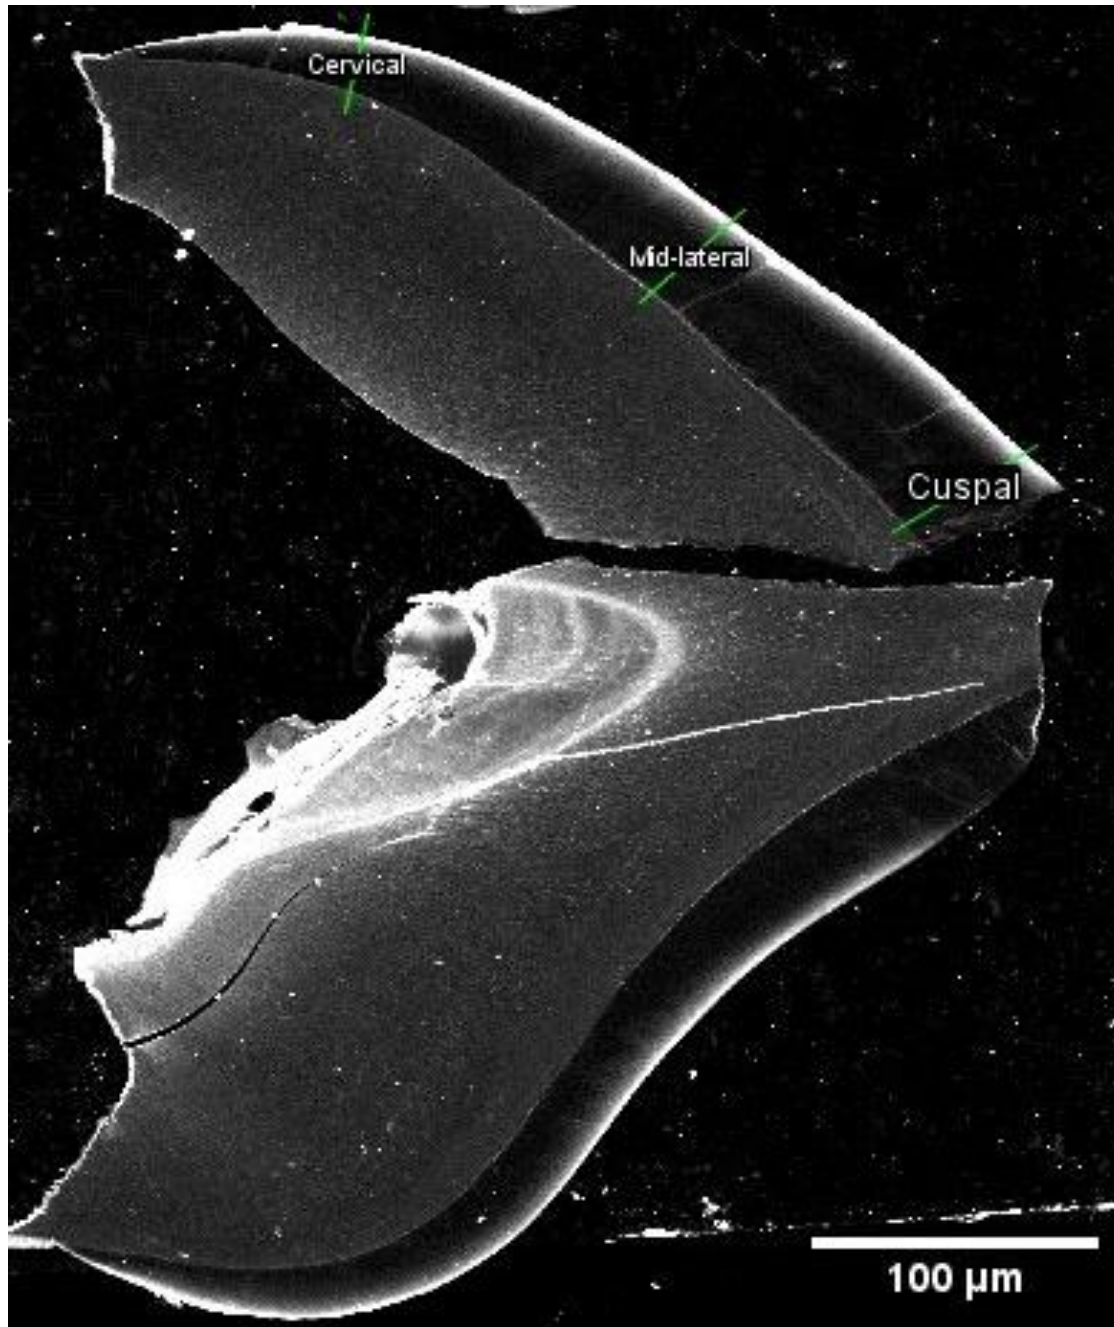

|             | Enamel thickness [ $\mu\text{m}$ ] | Zn peak (ppm) | Zn peak width ( $\mu\text{m}$ [%]) |
|-------------|------------------------------------|---------------|------------------------------------|
| Cuspal      | 44                                 | 434           | 16 [36.4%]                         |
| Mid-lateral | 42                                 | 885           | 17 [40.5%]                         |
| Cervical    | 14                                 | 528           | 13 [92.9%]                         |

|             | "Take-off" to Zn peak ( $\mu\text{m}$ [%]) | Zn peak to OES ( $\mu\text{m}$ [%]) |
|-------------|--------------------------------------------|-------------------------------------|
| Cuspal      | 11 [25%]                                   | 5 [11.4%]                           |
| Mid-lateral | 14 [33.3%]                                 | 3 [7.1%]                            |
| Cervical    | 9 [64.3%]                                  | 4 [28.6%]                           |

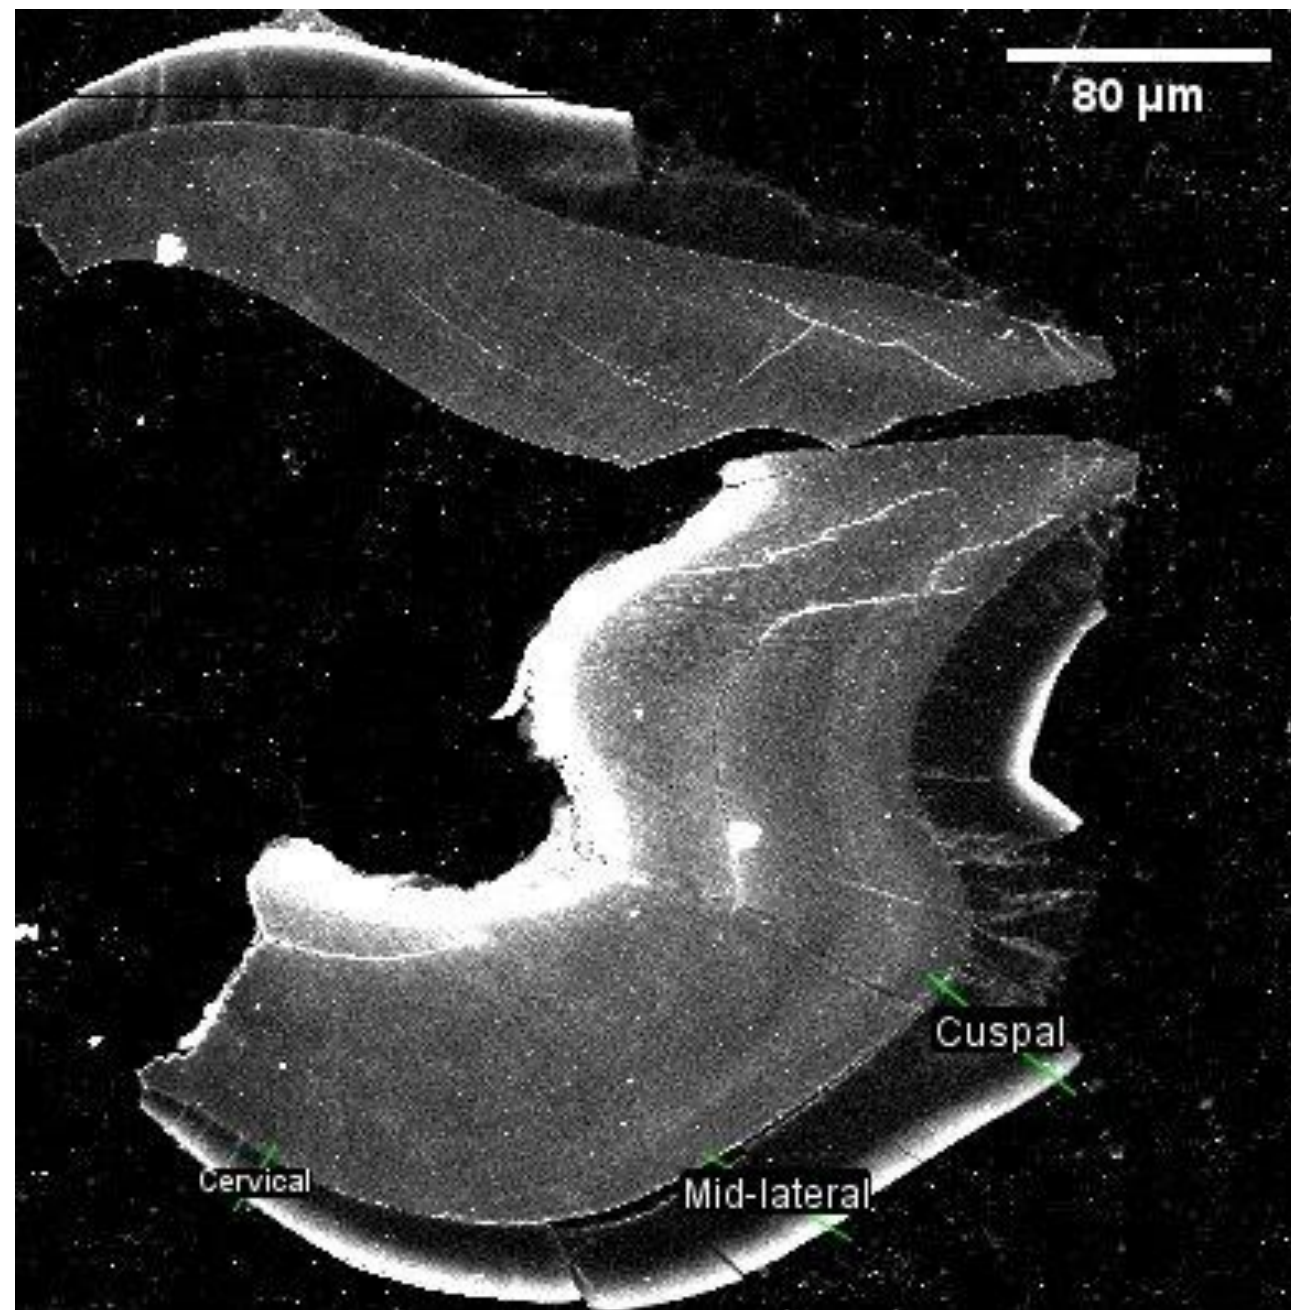

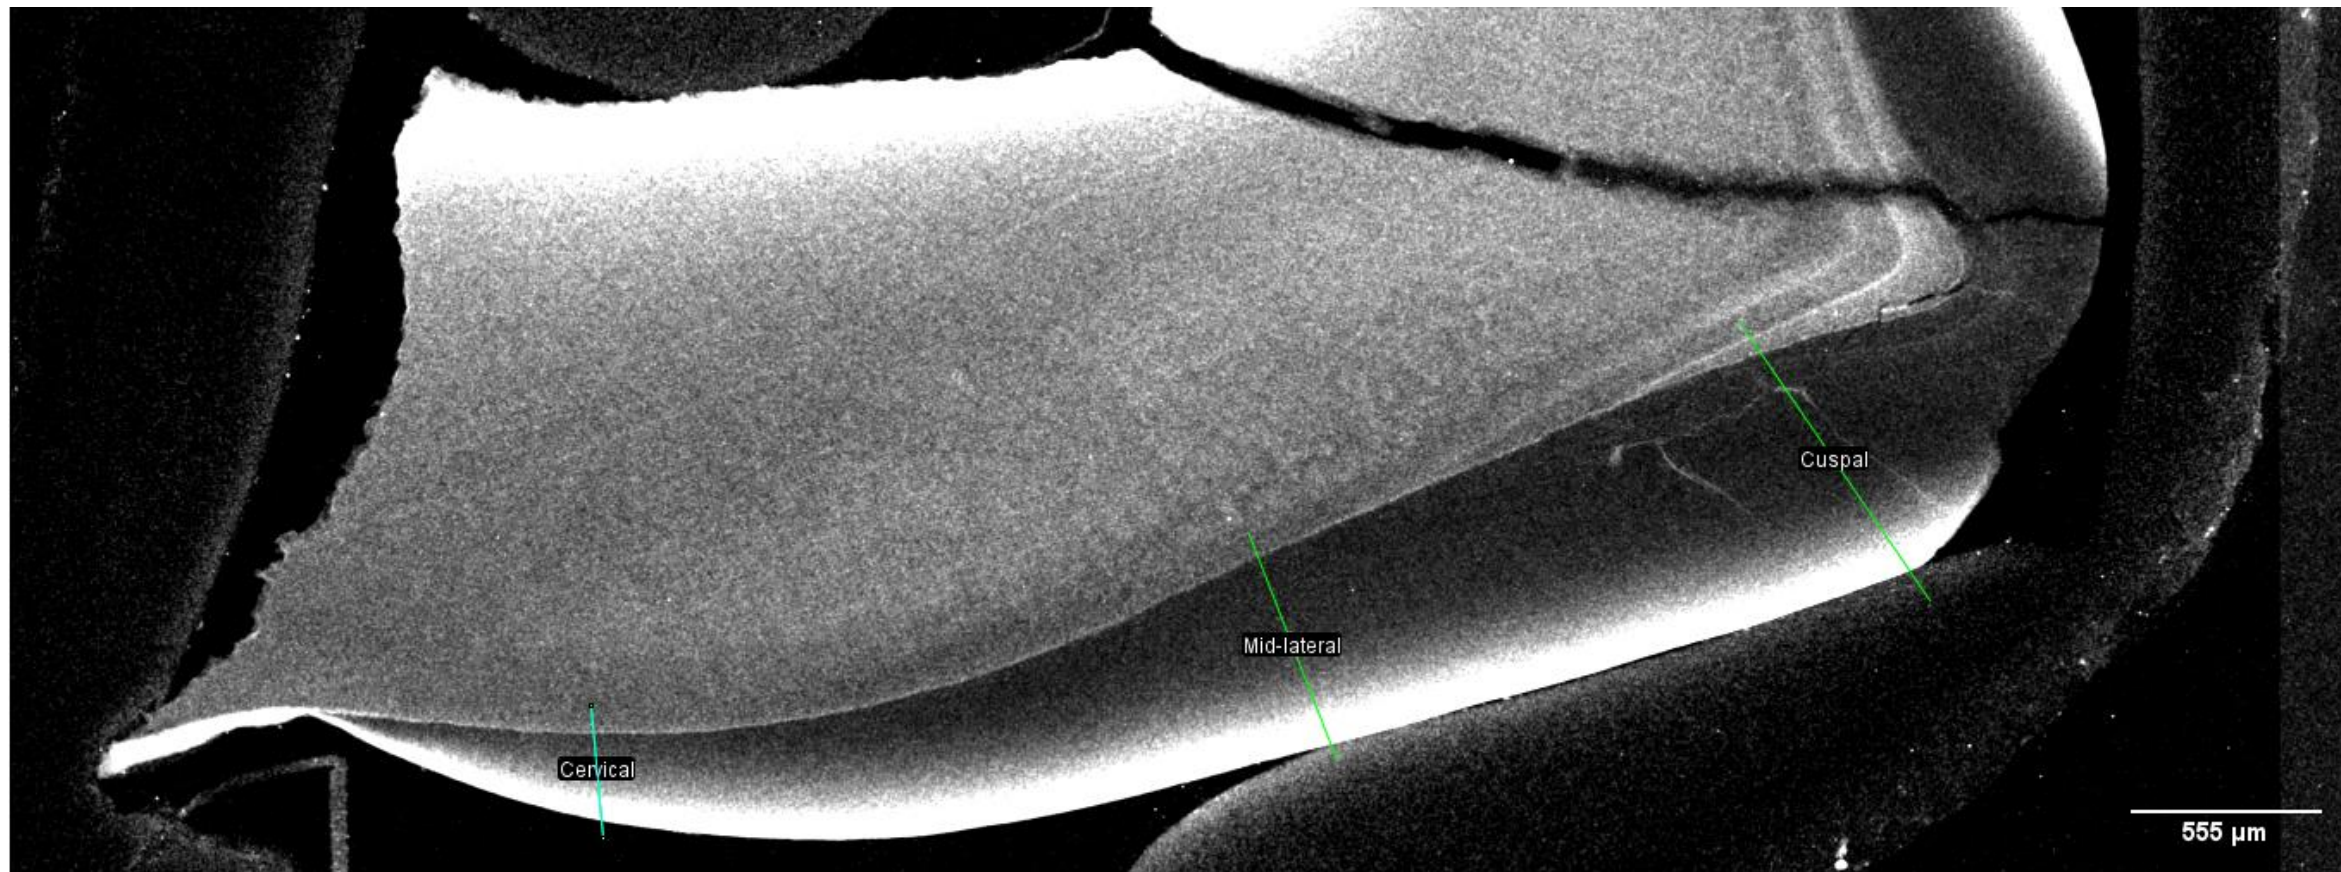

|                    | Enamel thickness [ $\mu\text{m}$ ] | Zn peak (ppm) | Zn peak width ( $\mu\text{m}$ [%]) | “Take-off” to Zn peak ( $\mu\text{m}$ [%]) | Zn peak to OES ( $\mu\text{m}$ [%]) |
|--------------------|------------------------------------|---------------|------------------------------------|--------------------------------------------|-------------------------------------|
| <b>Cuspal</b>      | 770                                | 986           | 282.5 [36.7%]                      | 267.5 [34.7%]                              | 15 [1.9%]                           |
| <b>Mid-lateral</b> | 590                                | 871           | 317.5 [53.8%]                      | 305 [51.7%]                                | 12.5 [2.1%]                         |
| <b>Cervical</b>    | 260                                | 981           | 240 [92.3%]                        | 220 [84.6%]                                | 20 [7.7]                            |

|             | Enamel thickness [ $\mu\text{m}$ ]         | Zn peak (ppm)                       | Zn peak width ( $\mu\text{m}$ [%]) |
|-------------|--------------------------------------------|-------------------------------------|------------------------------------|
| Cuspal      | 750                                        | 1456                                | 390 [52%]                          |
| Mid-lateral | 660                                        | 1383                                | 390 [59.1%]                        |
| Cervical    | 300                                        | 1000                                | 255 [85%]                          |
|             | "Take-off" to Zn peak ( $\mu\text{m}$ [%]) | Zn peak to OES ( $\mu\text{m}$ [%]) |                                    |
| Cuspal      | 360 [48%]                                  | 30 [4%]                             |                                    |
| Mid-lateral | 330 [50%]                                  | 60 [9.1%]                           |                                    |
| Cervical    | 225 [75%]                                  | 30 [10%]                            |                                    |

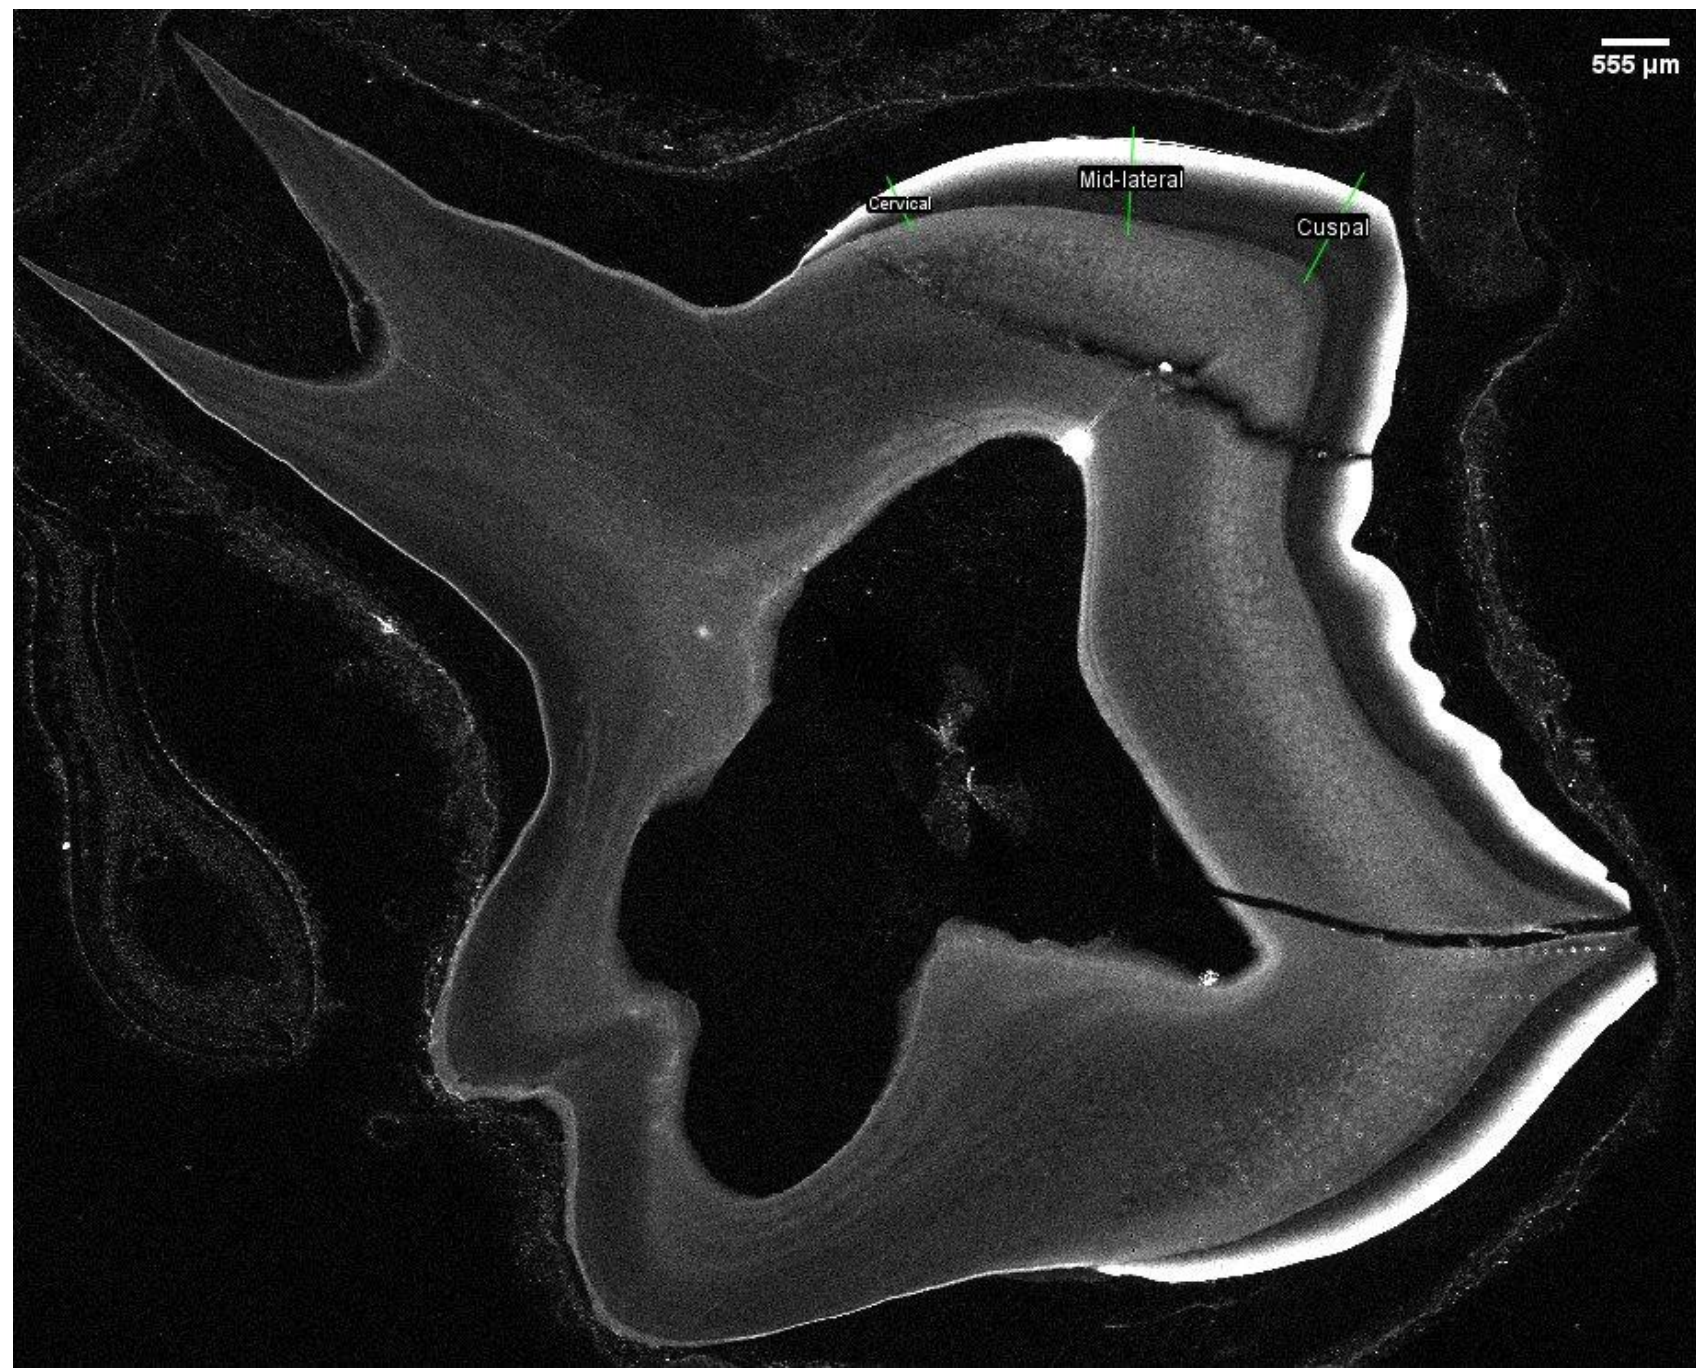

|             | Enamel thickness [ $\mu\text{m}$ ] | Zn peak (ppm) | Zn peak width ( $\mu\text{m}$ [%]) |
|-------------|------------------------------------|---------------|------------------------------------|
| Cuspal      | 792                                | 1743          | 336 [42.4%]                        |
| Mid-lateral | 612                                | 1222          | 348 [56.9%]                        |
| Cervical    | 252                                | 539           | 240 [95.2%]                        |

  

|             | "Take-off" to Zn peak ( $\mu\text{m}$ [%]) | Zn peak to OES ( $\mu\text{m}$ [%]) |
|-------------|--------------------------------------------|-------------------------------------|
| Cuspal      | 300 [37.9%]                                | 36 [4.5%]                           |
| Mid-lateral | 312 [51%]                                  | 36 [5.9%]                           |
| Cervical    | 156 [61.9%]                                | 84 [33.3%]                          |

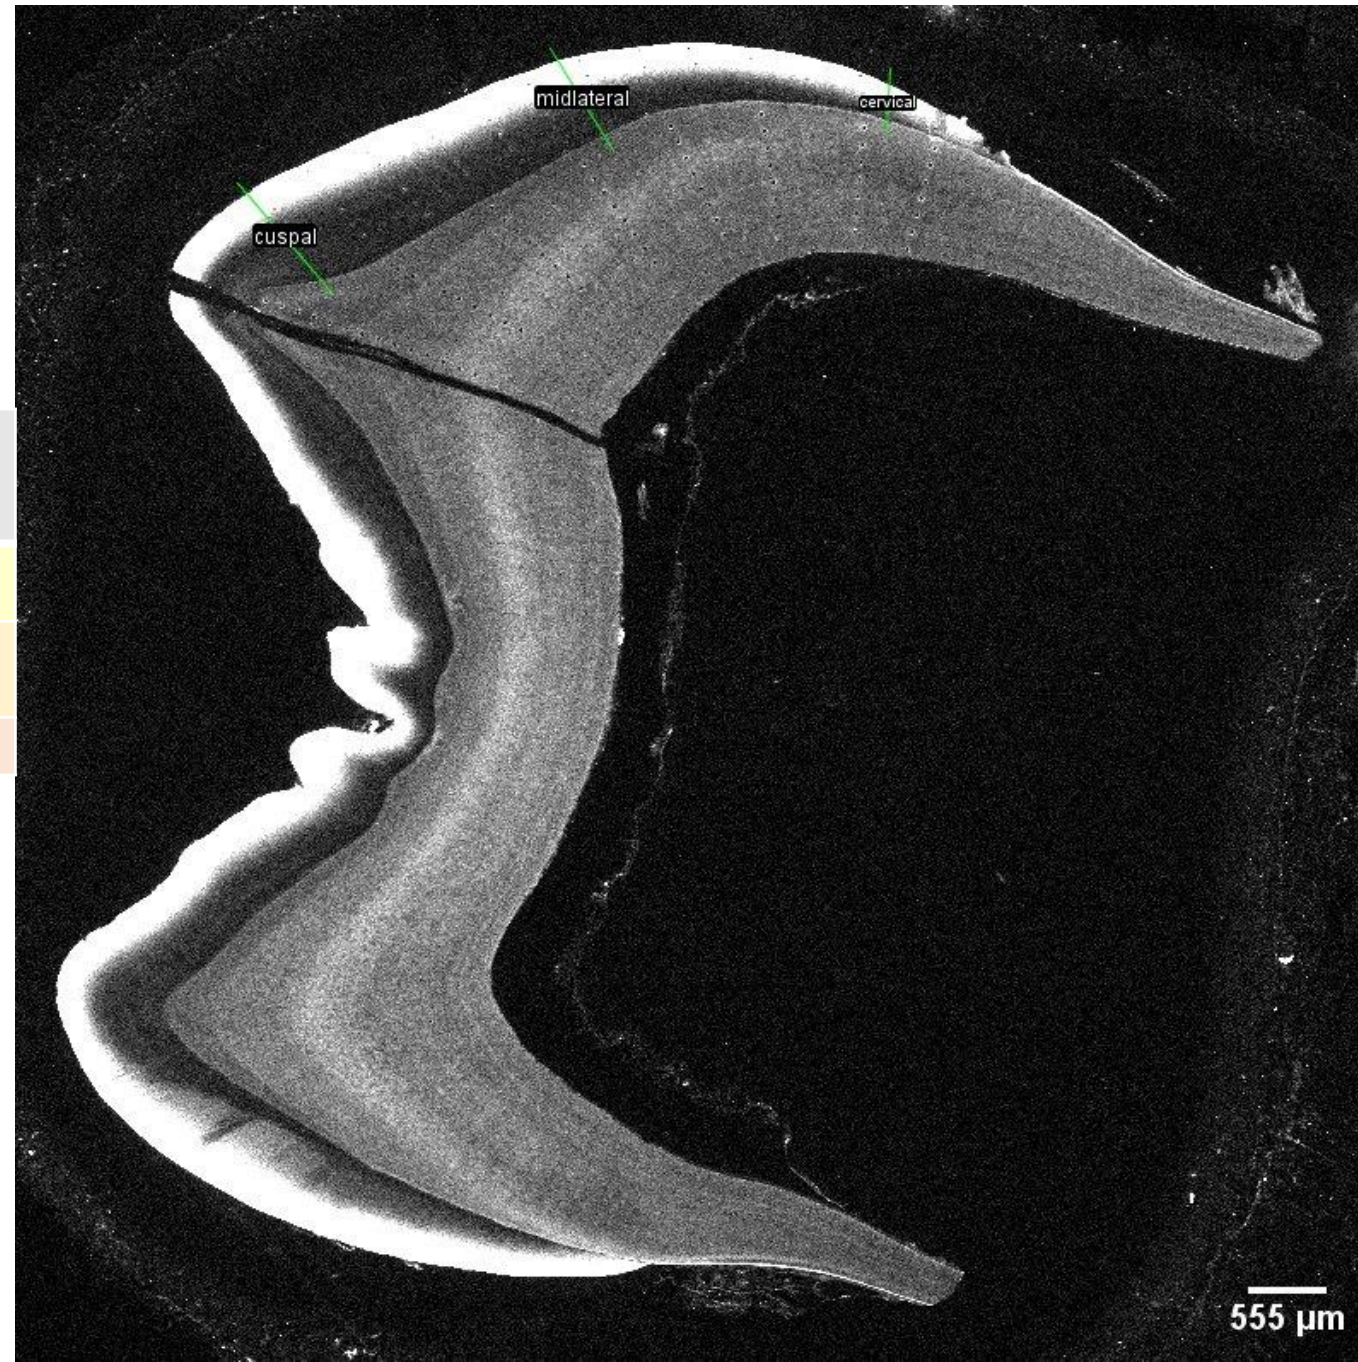

|             | Enamel thickness [ $\mu\text{m}$ ] | Zn peak (ppm) | Zn peak width ( $\mu\text{m}$ [%]) |
|-------------|------------------------------------|---------------|------------------------------------|
| Cuspal      | 690                                | 733           | 255 [37%]                          |
| Mid-lateral | 435                                | 197           | 300 [69%]                          |
| Cervical    | 300                                | 1602          | 240 [80%]                          |

  

|             | "Take-off" to Zn peak ( $\mu\text{m}$ [%]) | Zn peak to OES ( $\mu\text{m}$ [%]) |
|-------------|--------------------------------------------|-------------------------------------|
| Cuspal      | 210 [30.4%]                                | 45 [6.5%]                           |
| Mid-lateral | 255 [58.6%]                                | 45 [10.3%]                          |
| Cervical    | 210 [70%]                                  | 30 [10%]                            |

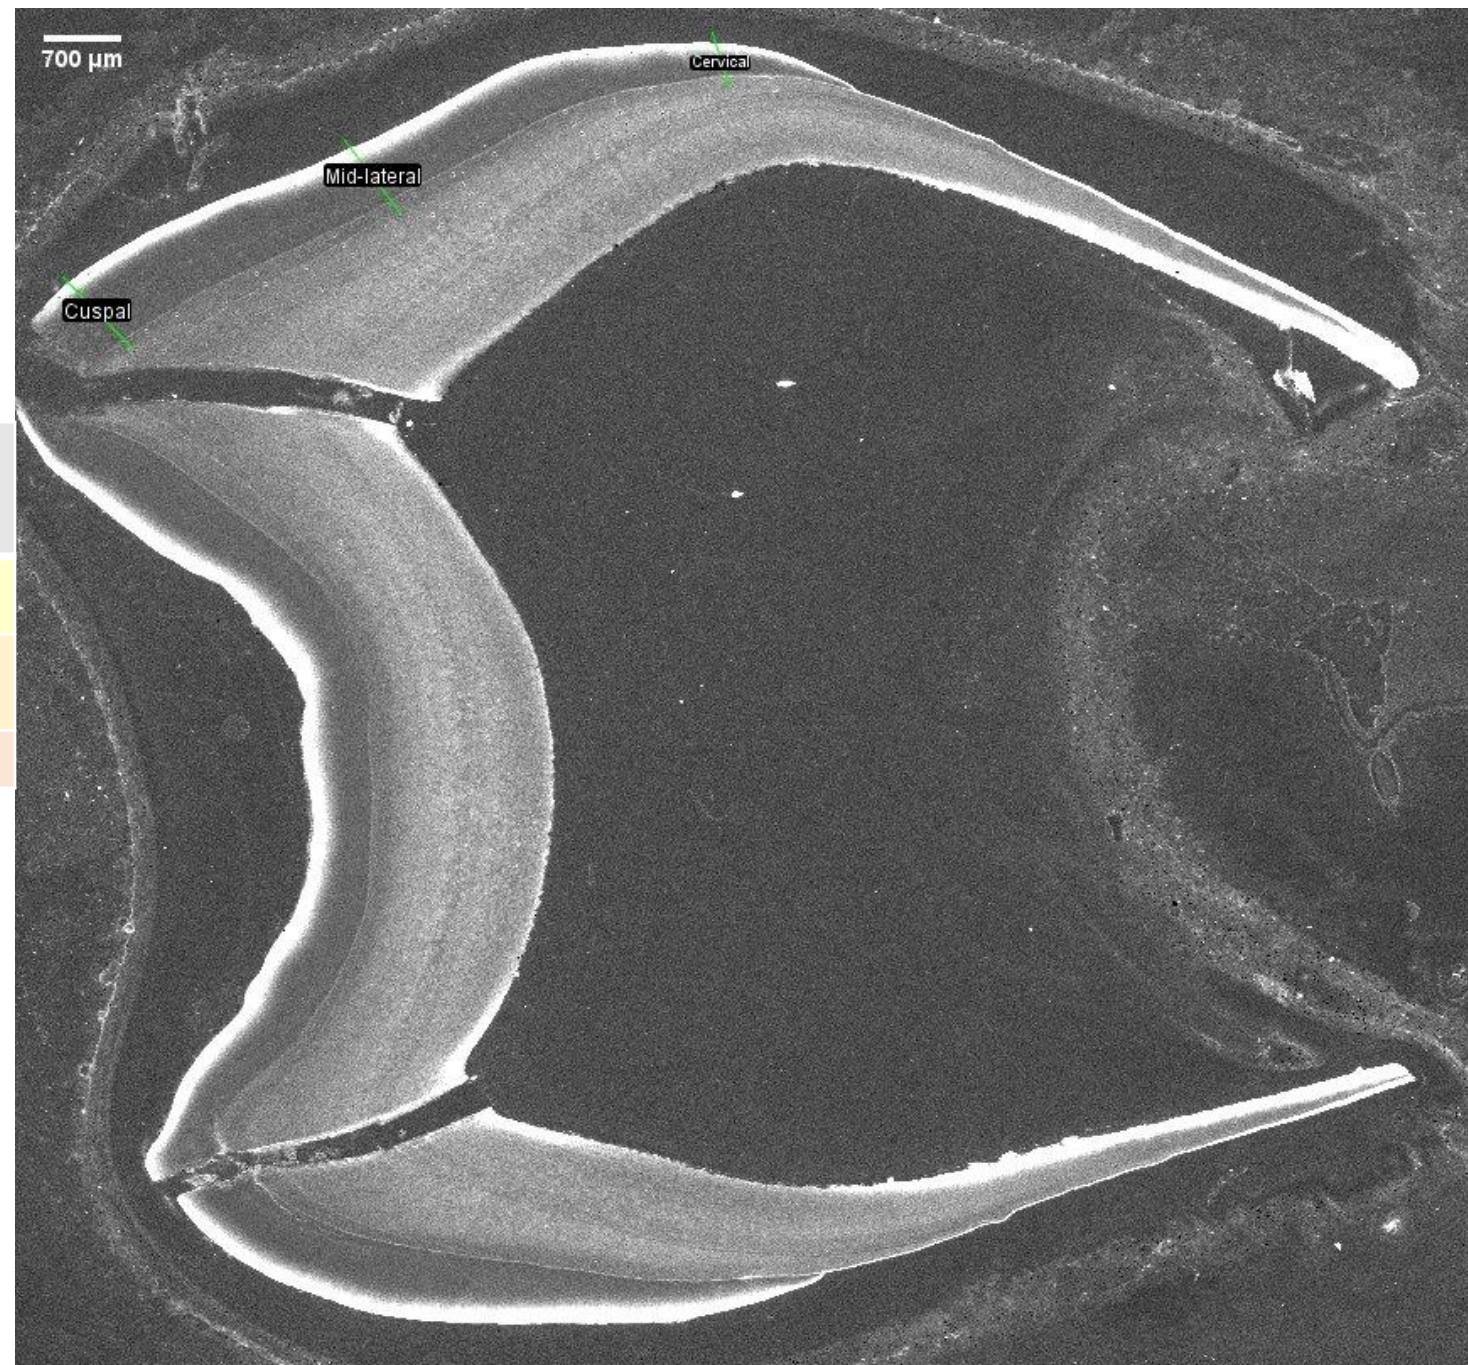

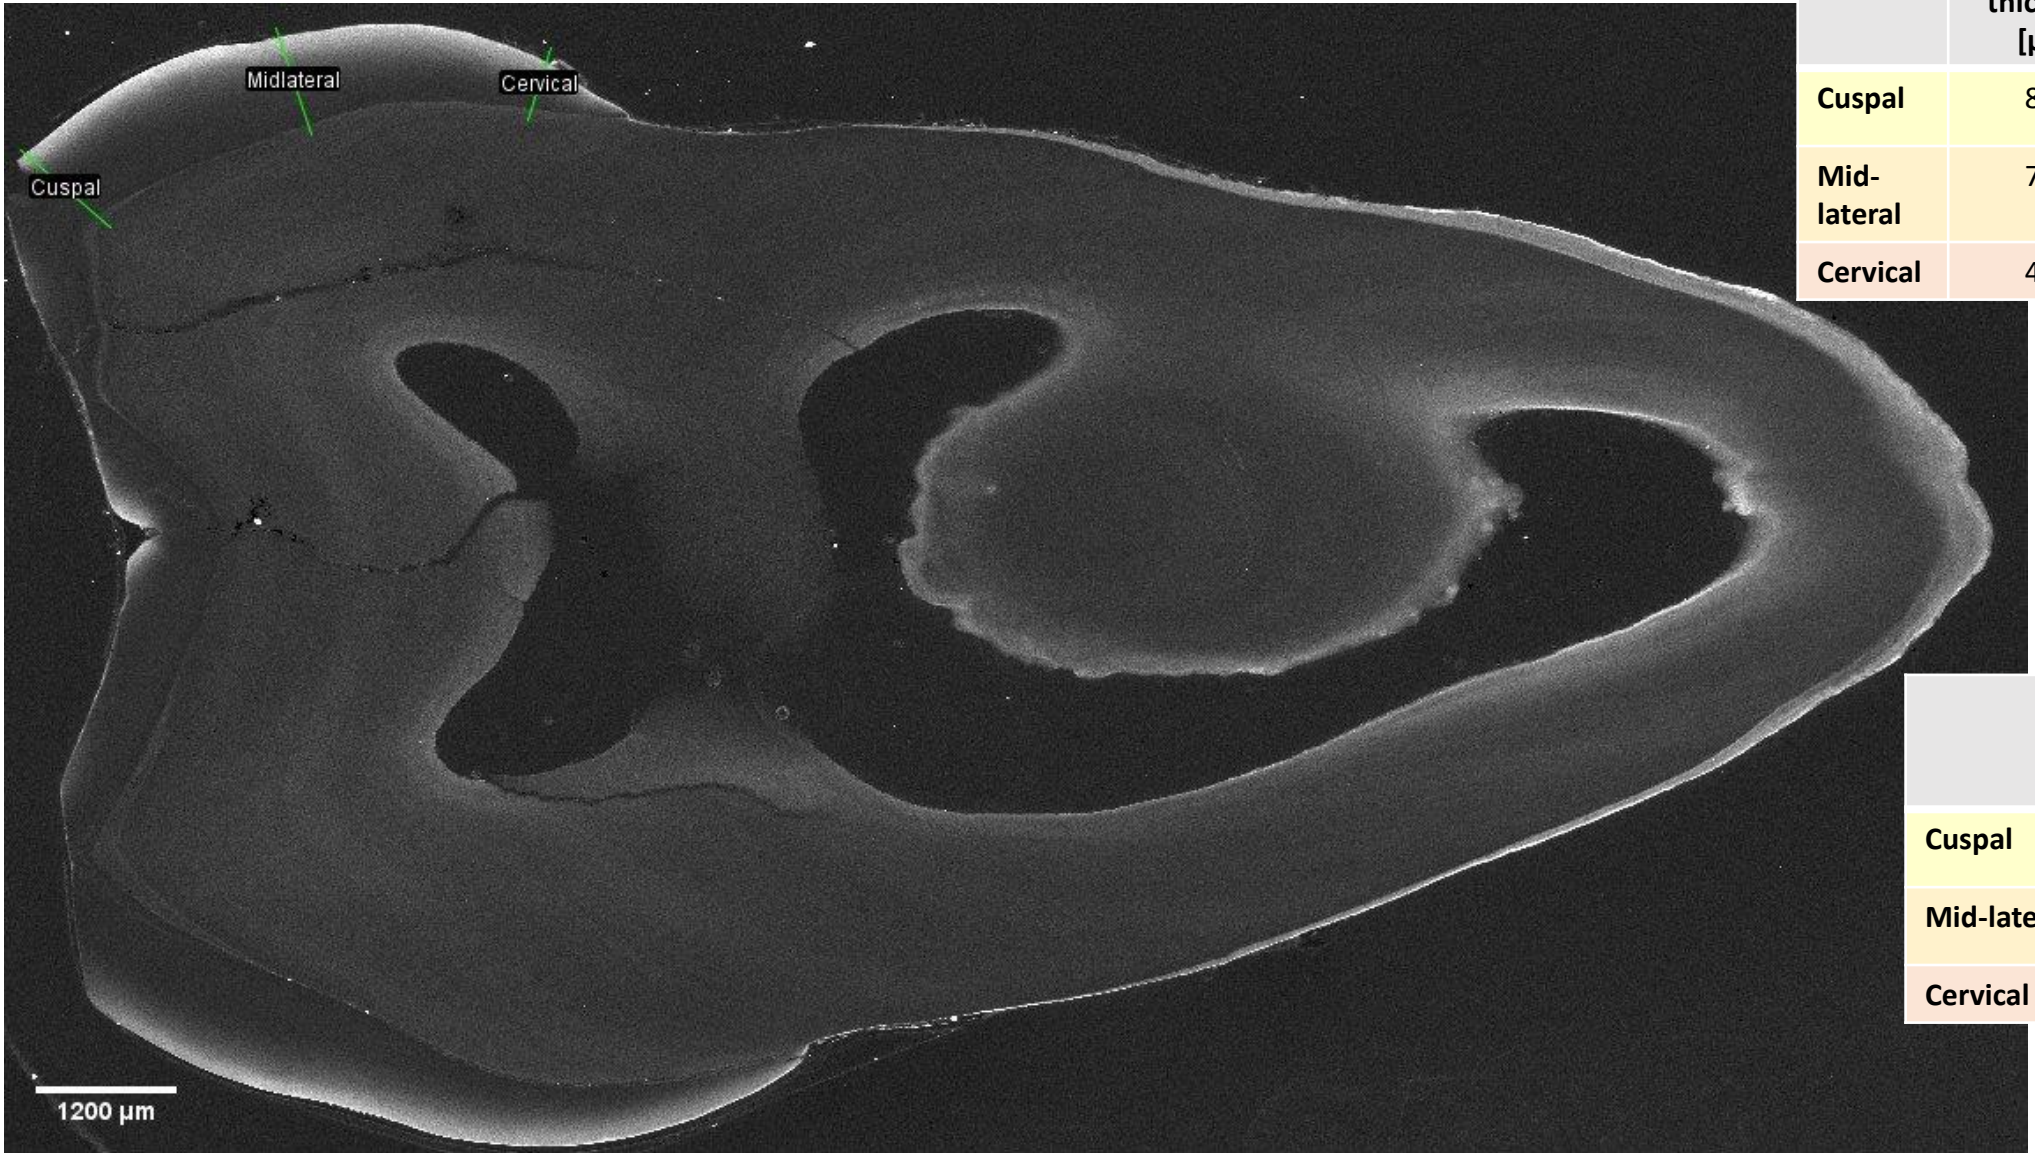

|             | Enamel thickness [ $\mu\text{m}$ ] | Zn peak (ppm) | Zn peak width ( $\mu\text{m}$ [%]) |
|-------------|------------------------------------|---------------|------------------------------------|
| Cuspal      | 810                                | 463           | 345 [42.6%]                        |
| Mid-lateral | 780                                | 562           | 510 [65.4%]                        |
| Cervical    | 420                                | 462           | 330 [78.3%]                        |

|             | "Take-off" to Zn peak ( $\mu\text{m}$ [%]) | Zn peak to OES ( $\mu\text{m}$ [%]) |
|-------------|--------------------------------------------|-------------------------------------|
| Cuspal      | 300 [37%]                                  | 45 [5.6%]                           |
| Mid-lateral | 450 [57.7%]                                | 60 [7.7%]                           |
| Cervical    | 285 [67.9%]                                | 45 [10.7%]                          |



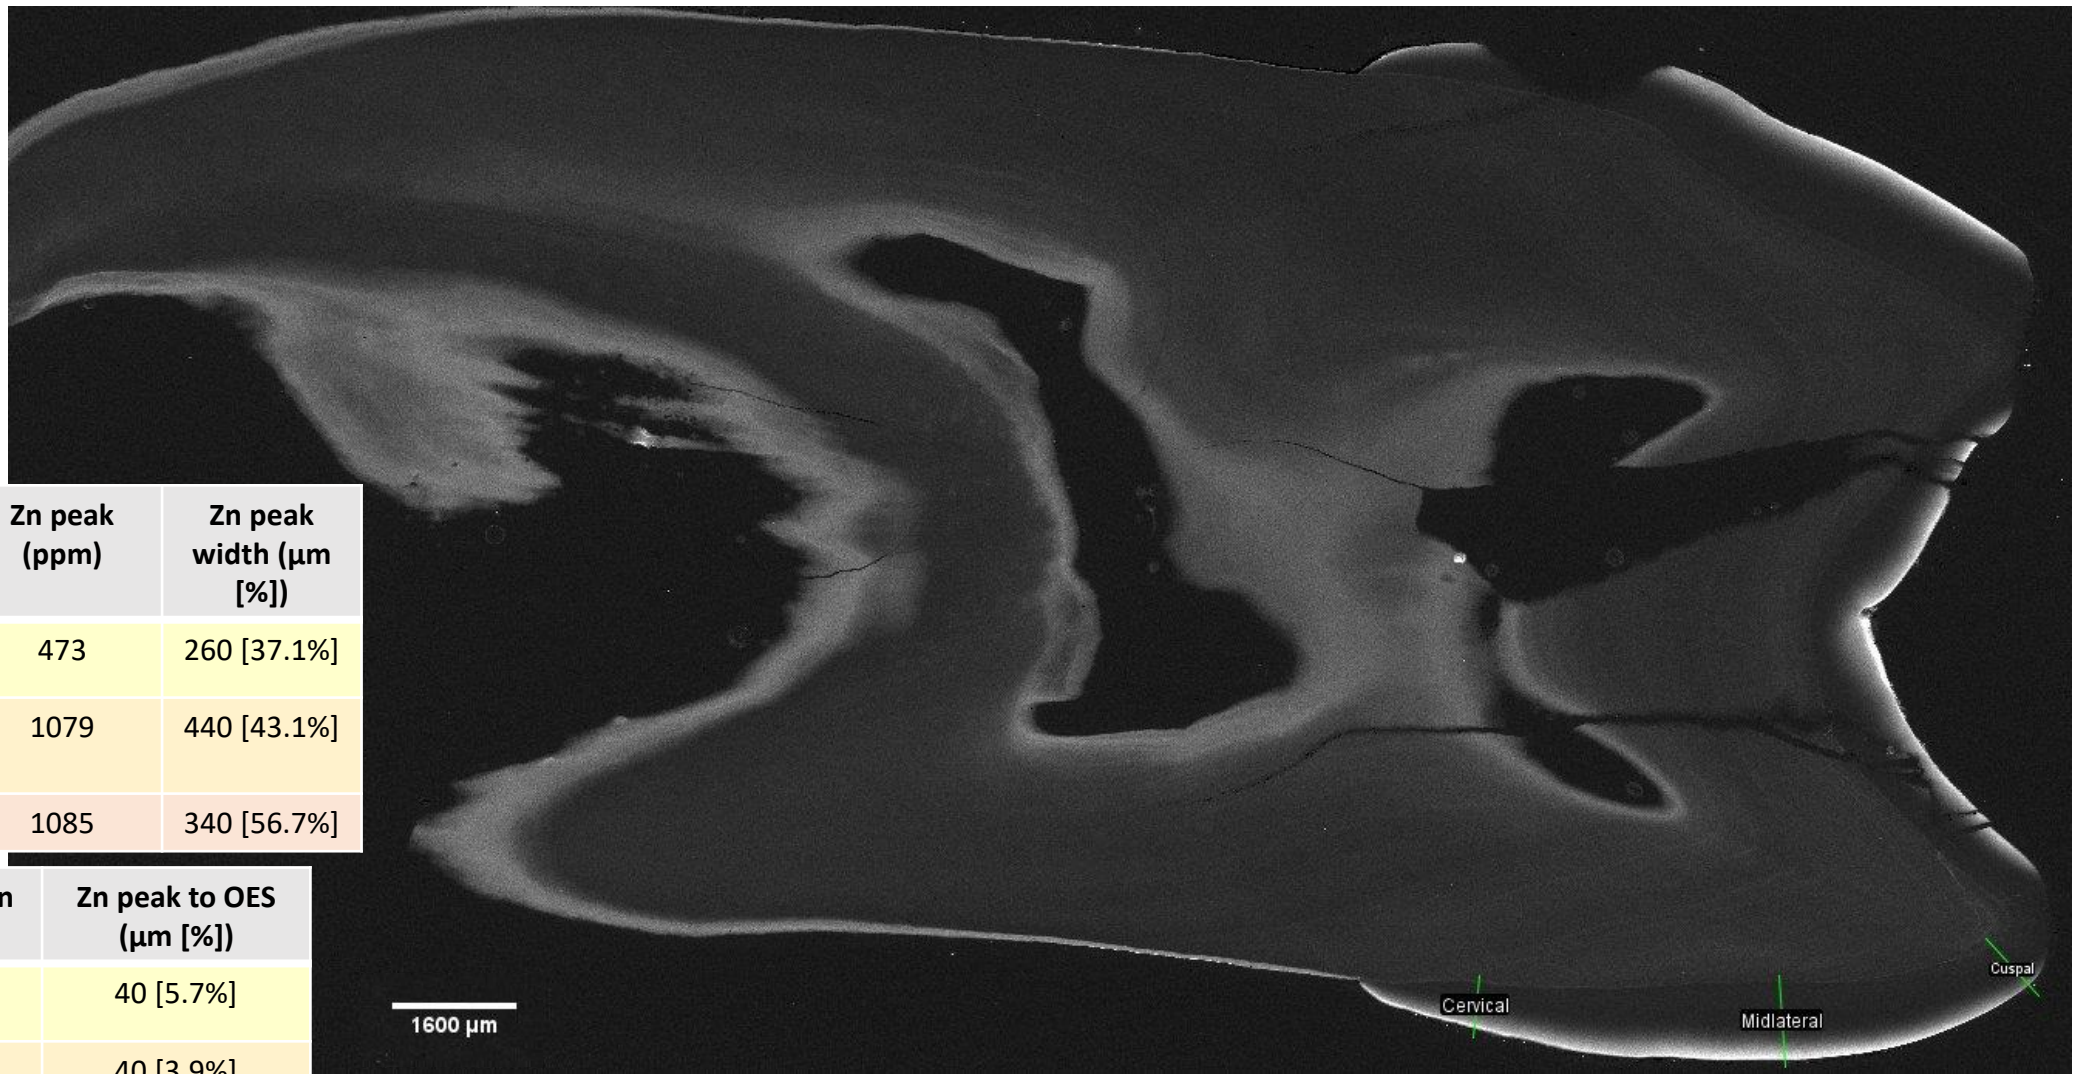

|             | Enamel thickness [μm] | Zn peak (ppm) | Zn peak width (μm [%]) |
|-------------|-----------------------|---------------|------------------------|
| Cuspal      | 700                   | 473           | 260 [37.1%]            |
| Mid-lateral | 1020                  | 1079          | 440 [43.1%]            |
| Cervical    | 600                   | 1085          | 340 [56.7%]            |

|             | "Take-off" to Zn peak (μm [%]) | Zn peak to OES (μm [%]) |
|-------------|--------------------------------|-------------------------|
| Cuspal      | 220 [31.4%]                    | 40 [5.7%]               |
| Mid-lateral | 400 [39.2%]                    | 40 [3.9%]               |
| Cervical    | 280 [46.7%]                    | 60 [10%]                |

|             | Enamel thickness [μm] | Zn peak (ppm) | Zn peak width (μm [%]) |
|-------------|-----------------------|---------------|------------------------|
| Cuspal      | 1460                  | 1120          | 500 [34.2%]            |
| Mid-lateral | 1620                  | 1507          | 480 [29.6%]            |
| Cervical    | 760                   | 699           | 360 [47.4%]            |

  

|             | “Take-off” to Zn peak (μm [%]) | Zn peak to OES (μm [%]) |
|-------------|--------------------------------|-------------------------|
| Cuspal      | 440 [30.1%]                    | 60 [4.1%]               |
| Mid-lateral | 440 [27.2%]                    | 40 [2.5%]               |
| Cervical    | 320 [42.1%]                    | 40 [5.3%]               |

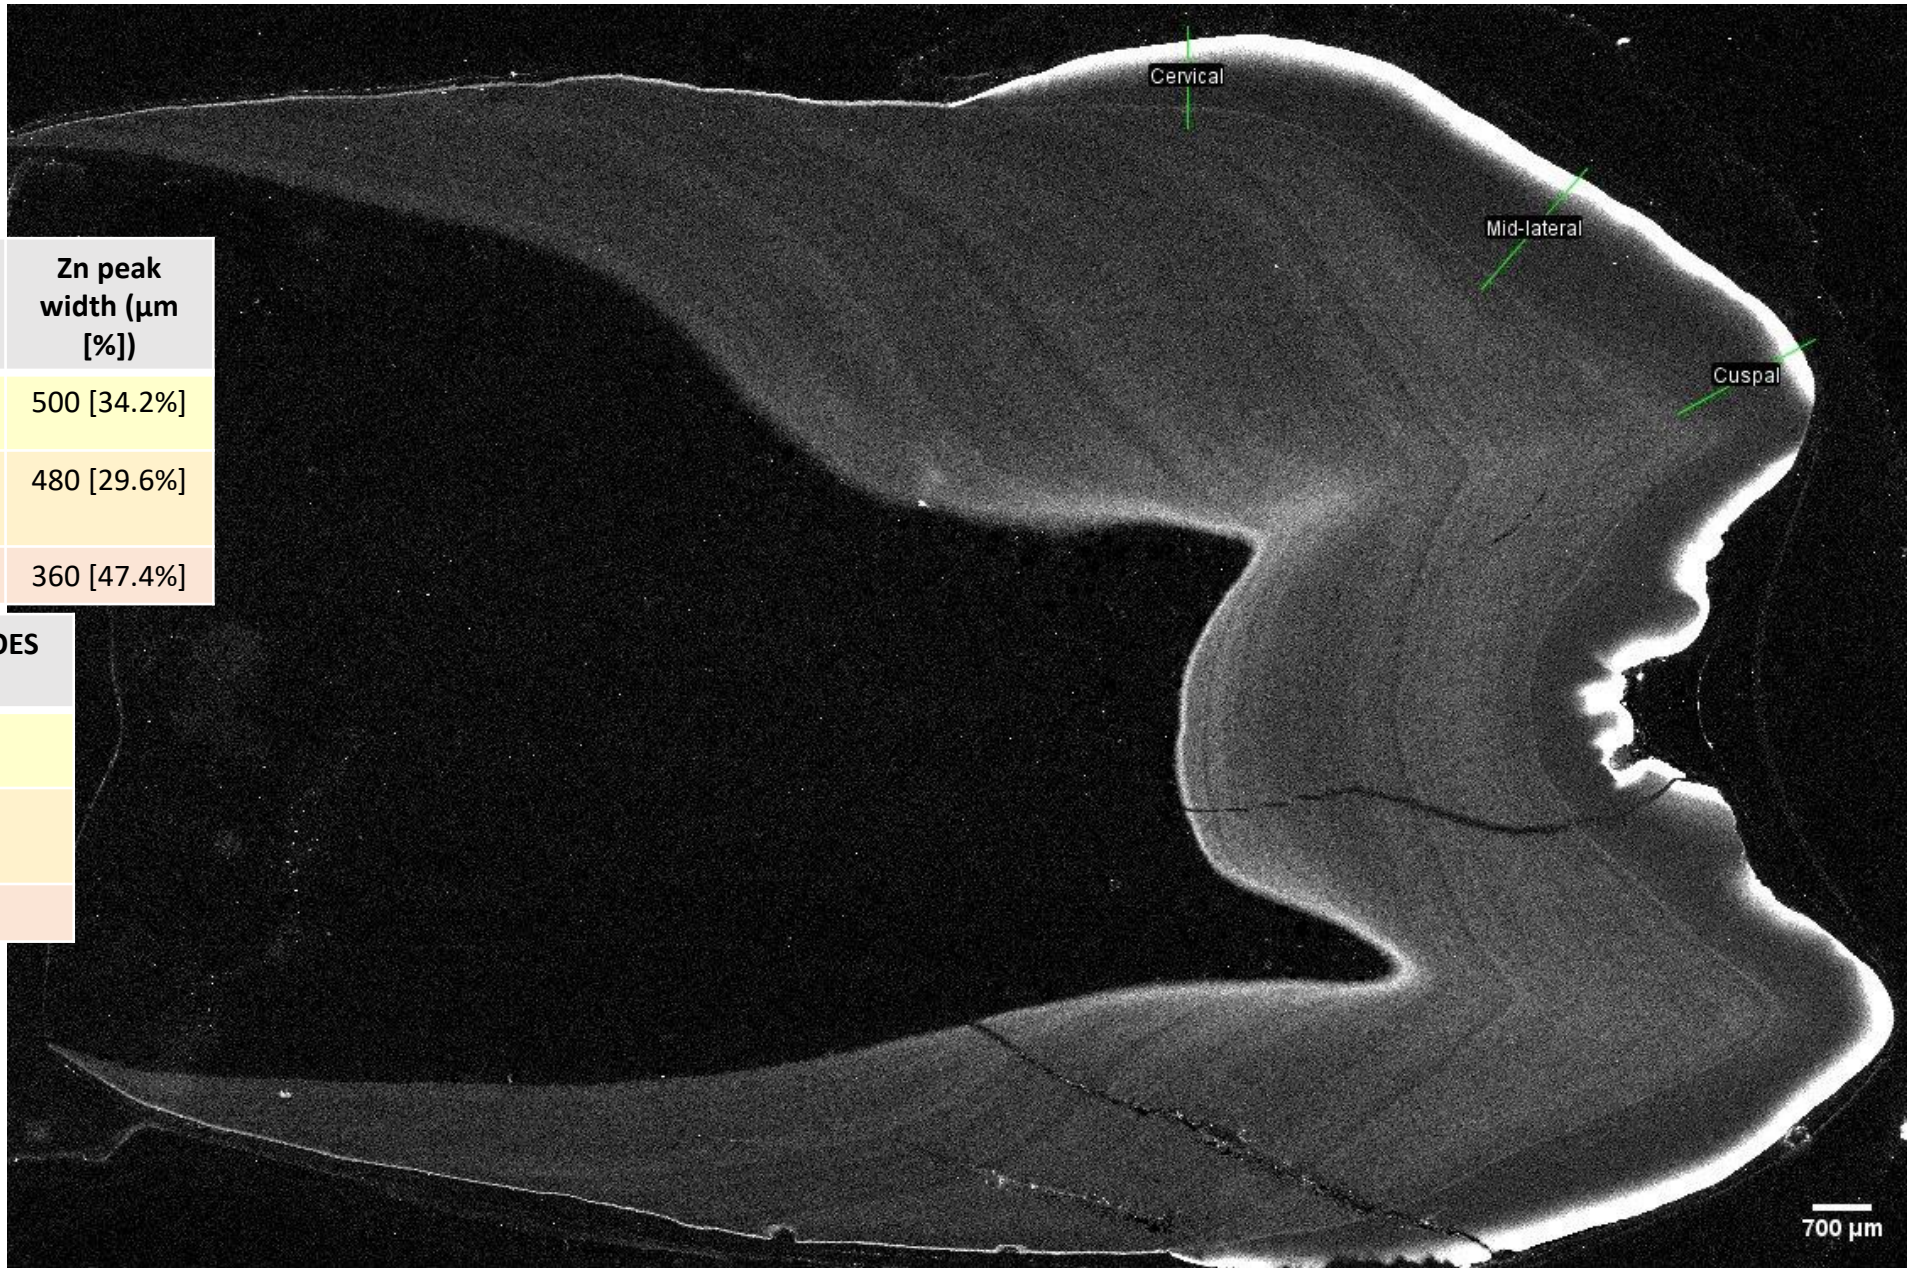

|             | Enamel thickness [μm] | Zn peak (ppm) | Zn peak width (μm [%]) |
|-------------|-----------------------|---------------|------------------------|
| Cuspal      | 1740                  | 790           | 680 [39.1%]            |
| Mid-lateral | 1120                  | 417           | 580 [51.8%]            |
| Cervical    | 840                   | 509           | 460 [54.8%]            |

|             | “Take-off” to Zn peak (μm [%]) | Zn peak to OES (μm [%]) |
|-------------|--------------------------------|-------------------------|
| Cuspal      | 640 [36.8%]                    | 40 [2.3%]               |
| Mid-lateral | 380 [33.9%]                    | 200 [17.9%]             |
| Cervical    | 340 [40.5%]                    | 120 [14.3%]             |

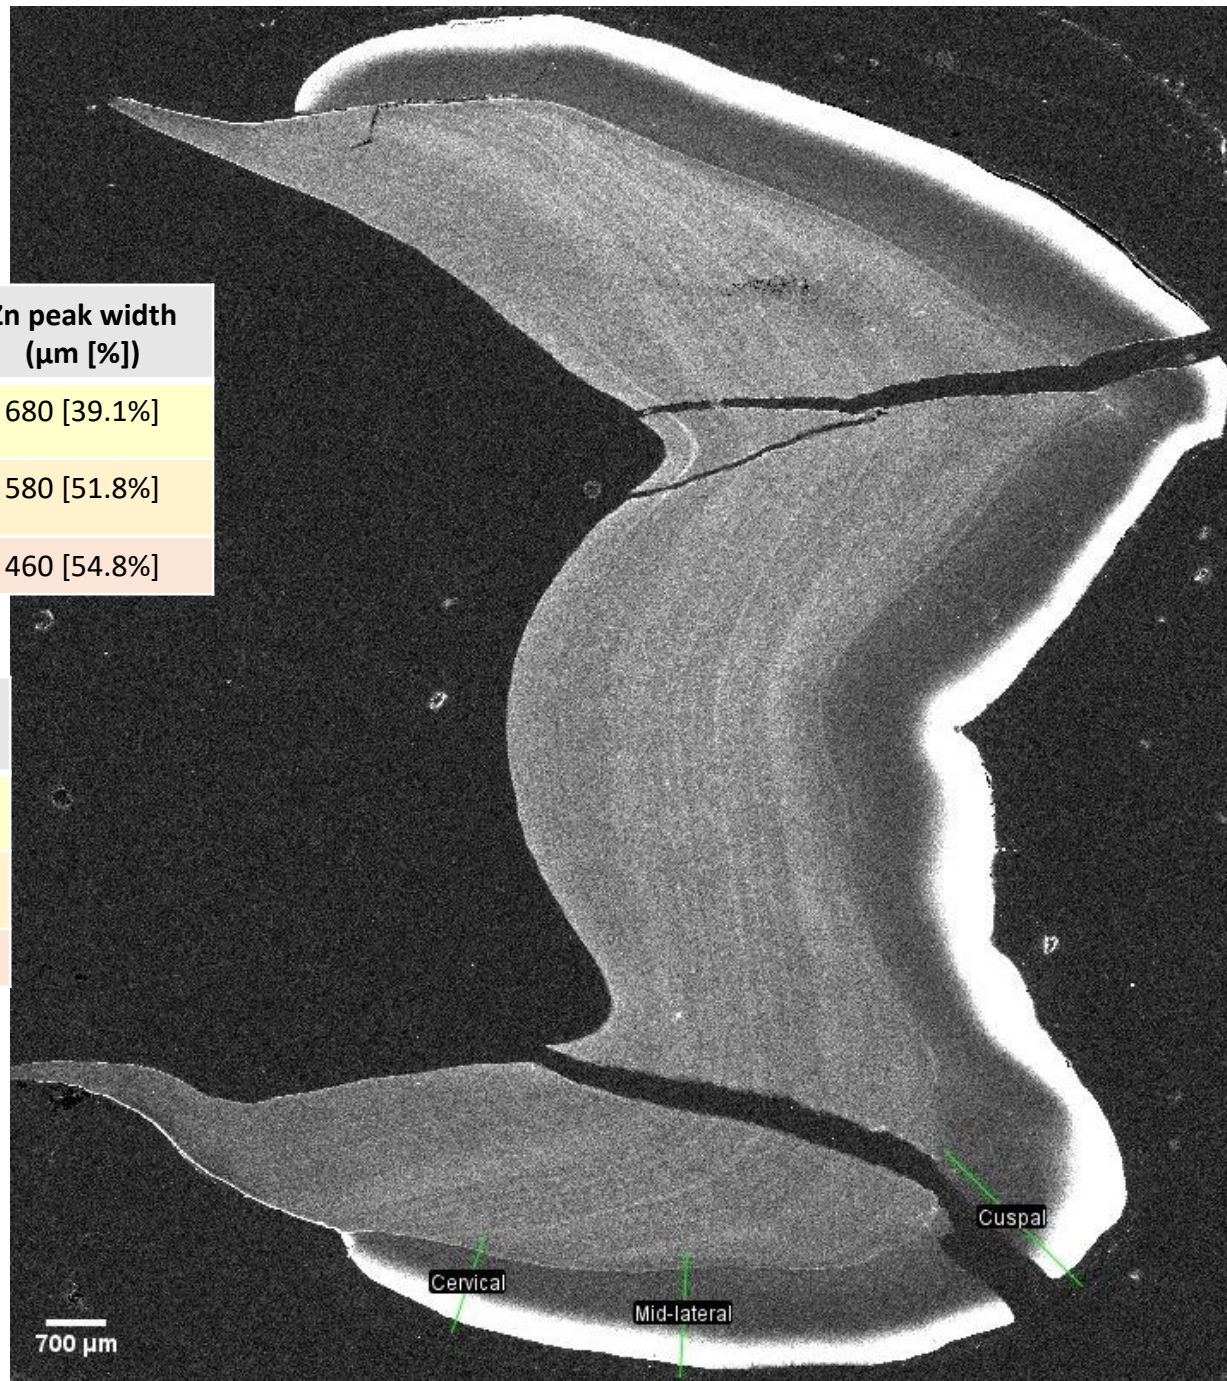

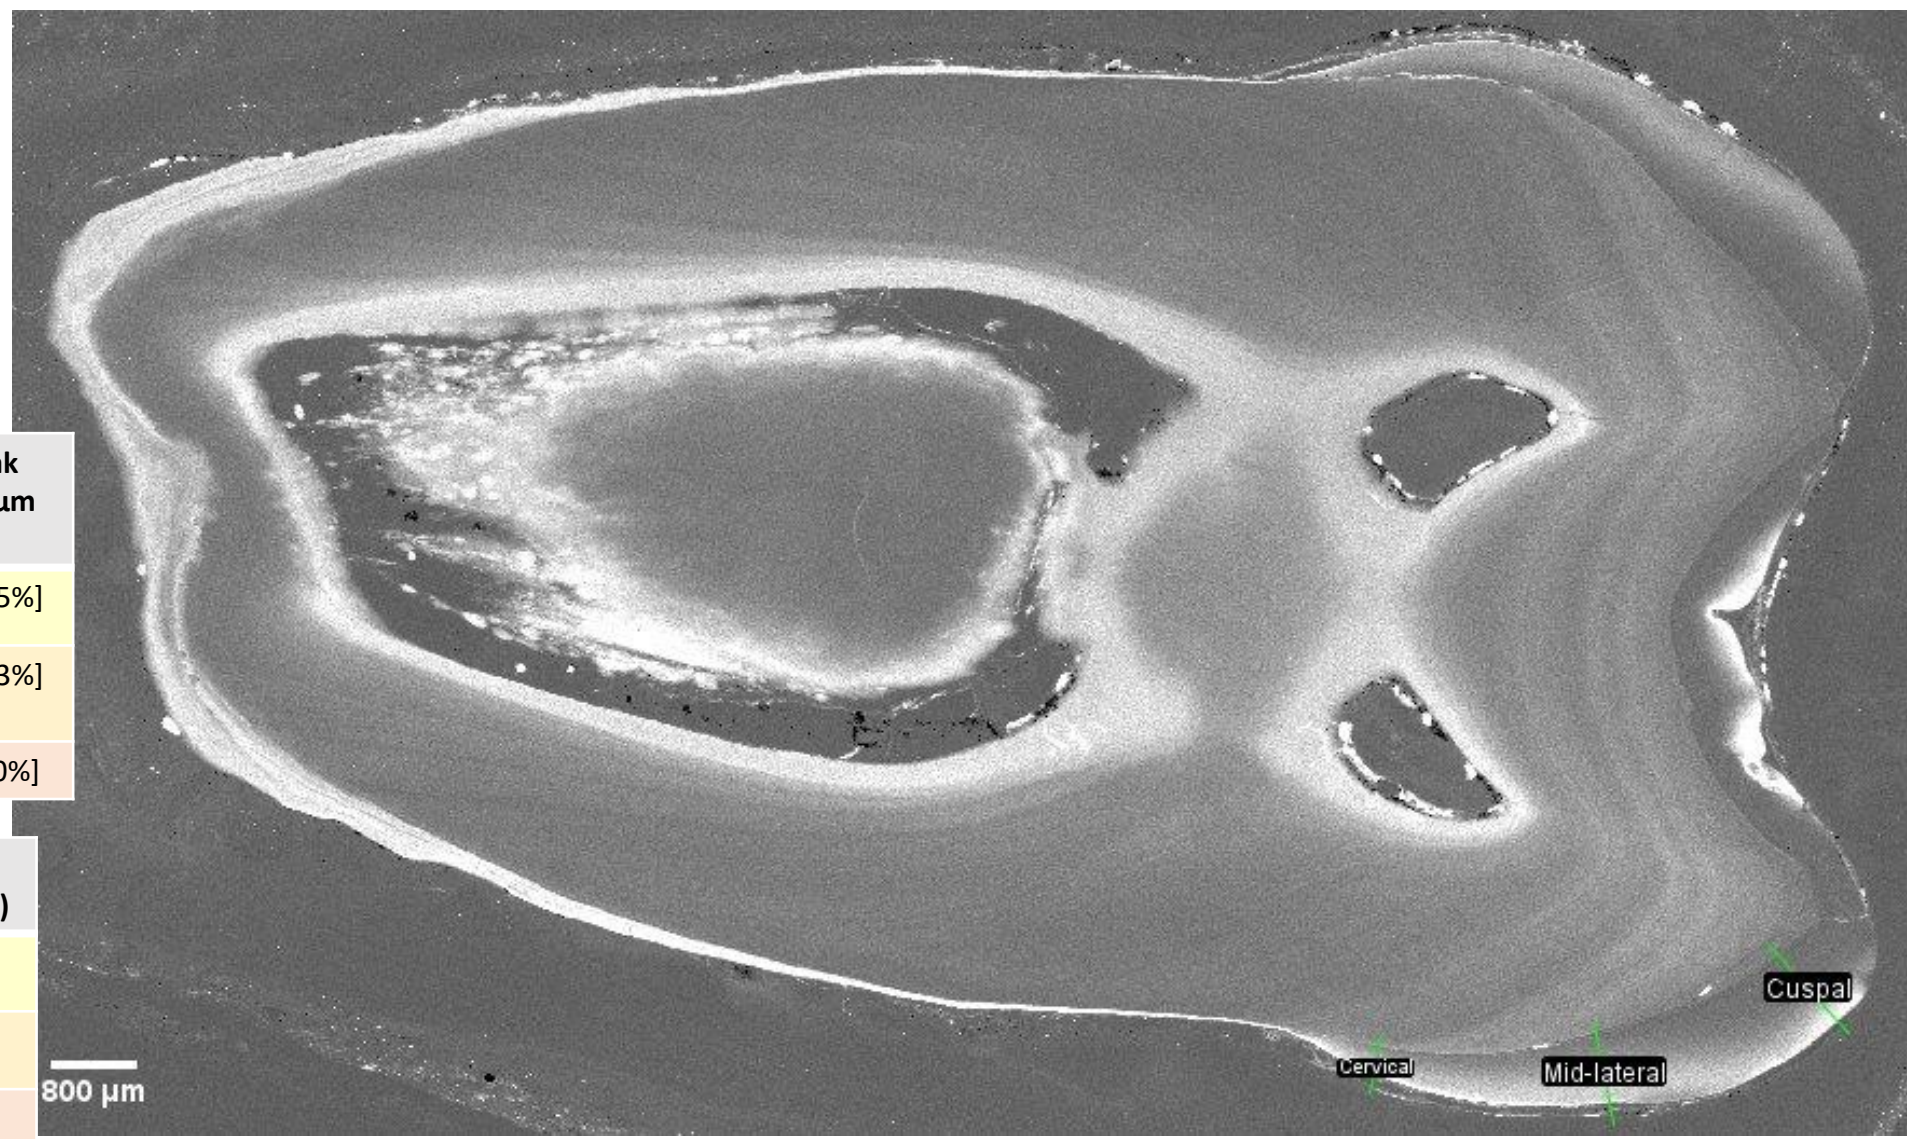

|             | Enamel thickness [μm] | Zn peak (ppm) | Zn peak width (μm [%]) |
|-------------|-----------------------|---------------|------------------------|
| Cuspal      | 800                   | 622           | 500 [62.5%]            |
| Mid-lateral | 680                   | 400           | 580 [85.3%]            |
| Cervical    | 260                   | 556           | 260 [100%]             |

|             | “Take-off” to Zn peak (μm [%]) | Zn peak to OES (μm [%]) |
|-------------|--------------------------------|-------------------------|
| Cuspal      | 440 [55%]                      | 60 [7.5%]               |
| Mid-lateral | 540 [79.4%]                    | 40 [5.9%]               |
| Cervical    | 200 [76.9%]                    | 60 [23.1%]              |

|             | Enamel thickness [ $\mu\text{m}$ ] | Zn peak (ppm) | Zn peak width ( $\mu\text{m}$ [%]) |
|-------------|------------------------------------|---------------|------------------------------------|
| Cuspal      | 960                                | 752           | 460 [47.9%]                        |
| Mid-lateral | 760                                | 696           | 540 [71.1%]                        |
| Cervical    | 380                                | 776           | 320 [84.2%]                        |

|             | "Take-off" to Zn peak ( $\mu\text{m}$ [%]) | Zn peak to OES ( $\mu\text{m}$ [%]) |
|-------------|--------------------------------------------|-------------------------------------|
| Cuspal      | 400 [41.7%]                                | 60 [6.3%]                           |
| Mid-lateral | 480 [63.2%]                                | 60 [7.9%]                           |
| Cervical    | 300 [78.9%]                                | 20 [5.3%]                           |

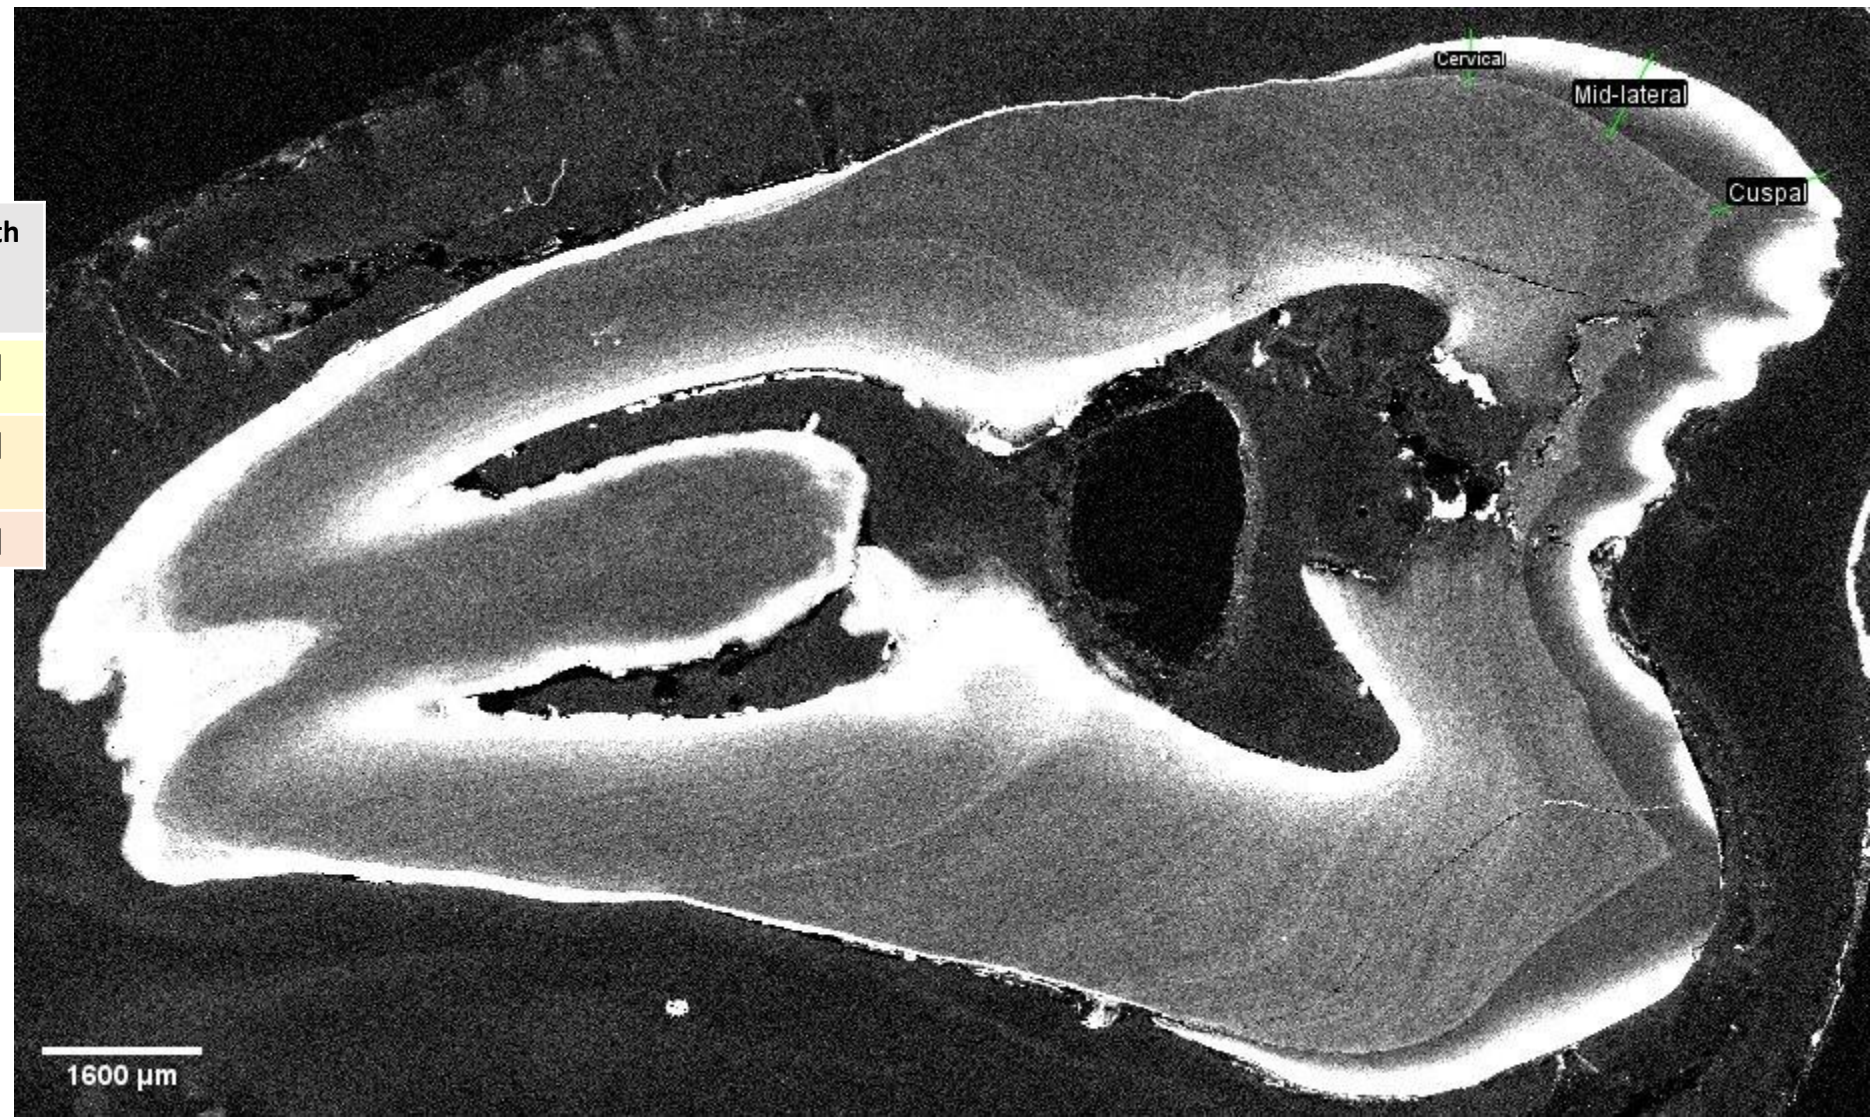

|             | Enamel thickness [μm] | Zn peak (ppm) | Zn peak width (μm [%]) |
|-------------|-----------------------|---------------|------------------------|
| Cuspal      | 990                   | 571           | 560 [56.6%]            |
| Mid-lateral | 710                   | 727           | 500 [70.4%]            |
| Cervical    | 400                   | 691           | 360 [90%]              |

|             | "Take-off" to Zn peak (μm [%]) | Zn peak to OES (μm [%]) |
|-------------|--------------------------------|-------------------------|
| Cuspal      | 510 [51.5%]                    | 50 [5.1%]               |
| Mid-lateral | 450 [63.4%]                    | 50 [7%]                 |
| Cervical    | 290 [72.5%]                    | 70 [17.5%]              |

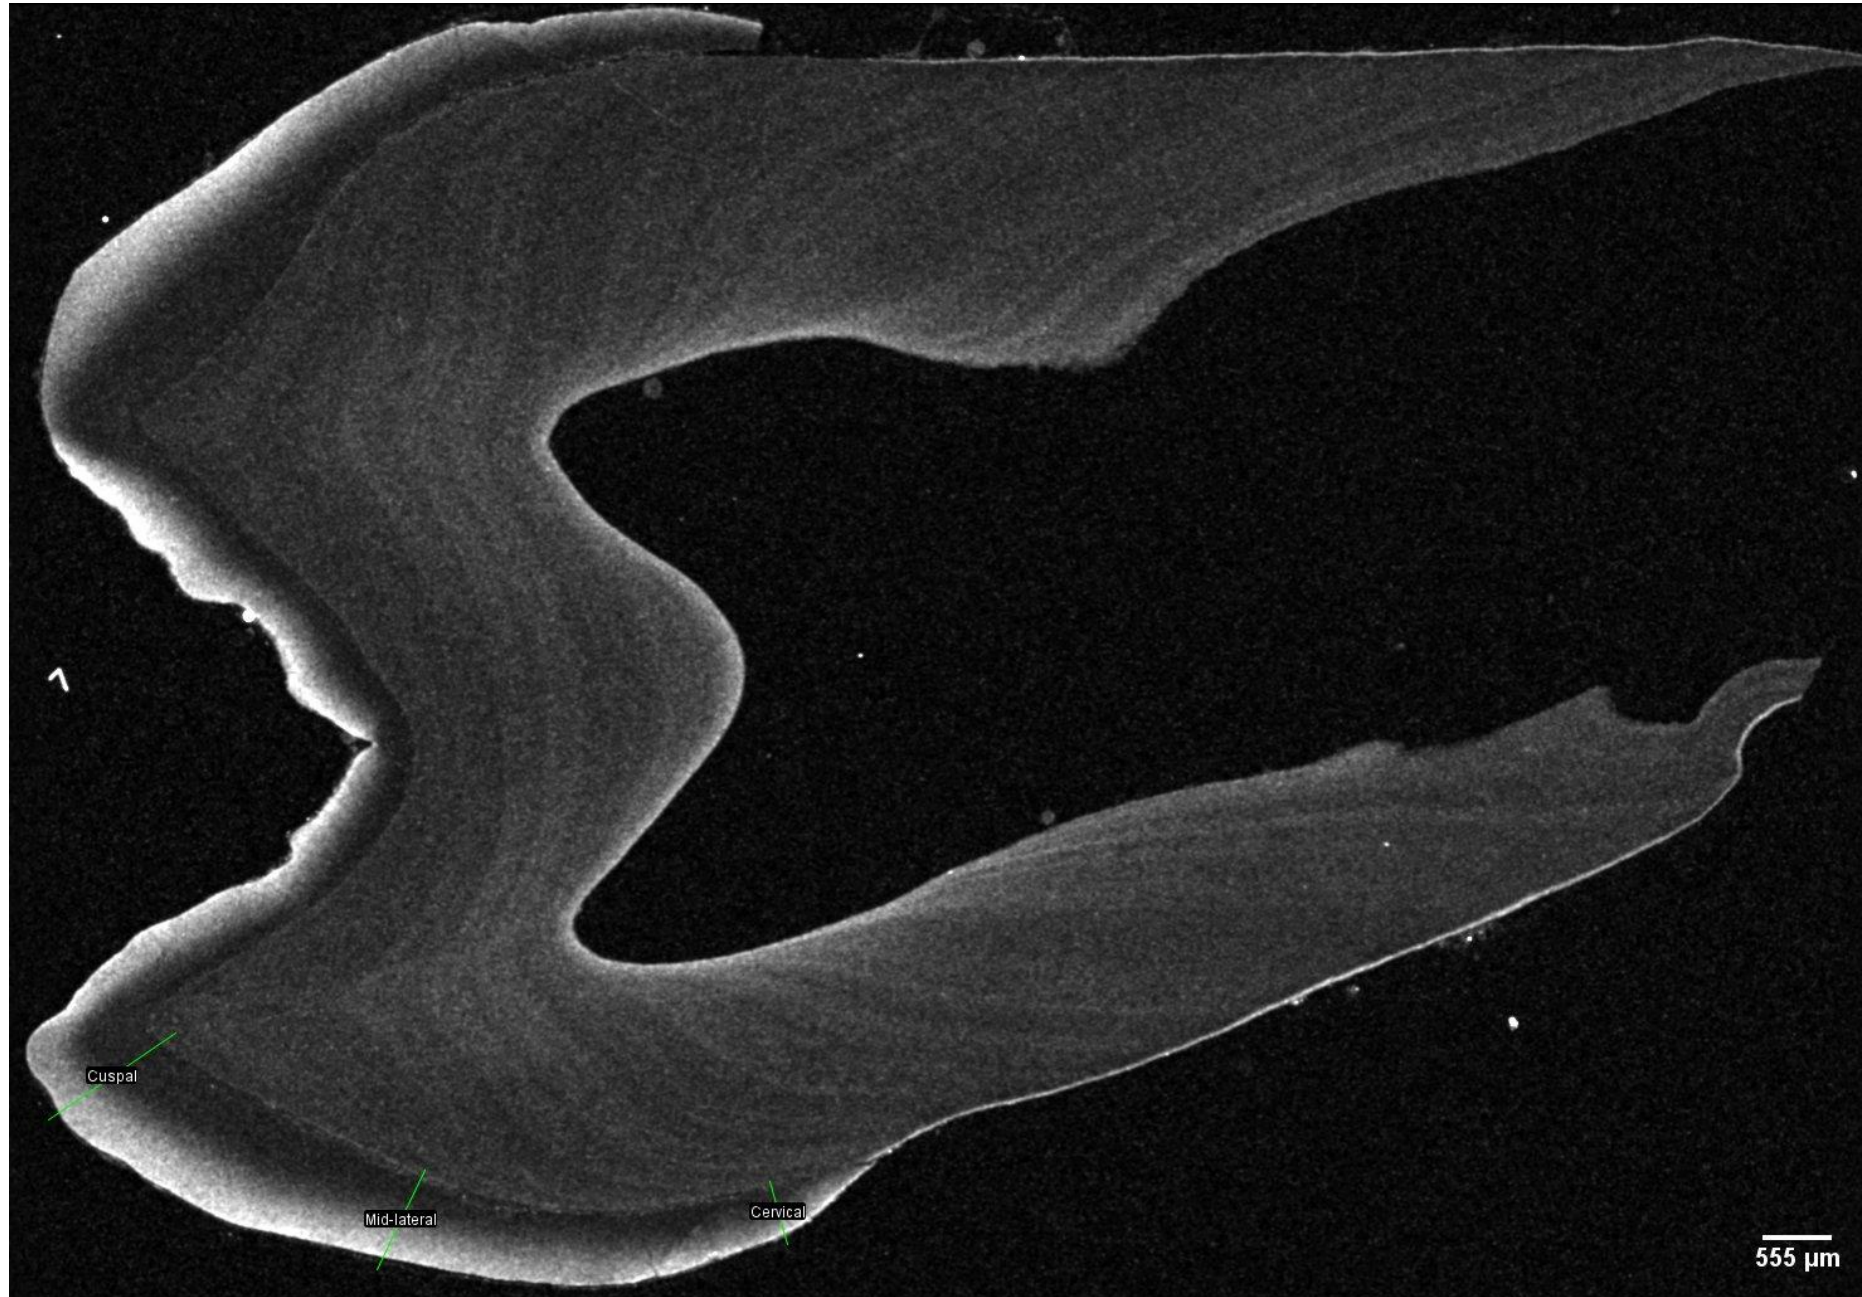

|             | Enamel thickness [μm] | Zn peak (ppm) | Zn peak width (μm [%]) |
|-------------|-----------------------|---------------|------------------------|
| Cuspal      | 510                   | 779           | 150 [29.4%]            |
| Mid-lateral | 520                   | 535           | 210 [40.4%]            |
| Cervical    | 370                   | 421           | 160 [43.2%]            |

|             | “Take-off” to Zn peak (μm [%]) | Zn peak to OES (μm [%]) |
|-------------|--------------------------------|-------------------------|
| Cuspal      | 120 [23.5%]                    | 30 [5.9%]               |
| Mid-lateral | 180 [34.6%]                    | 30 [5.8%]               |
| Cervical    | 140 [37.8%]                    | 20 [5.4%]               |

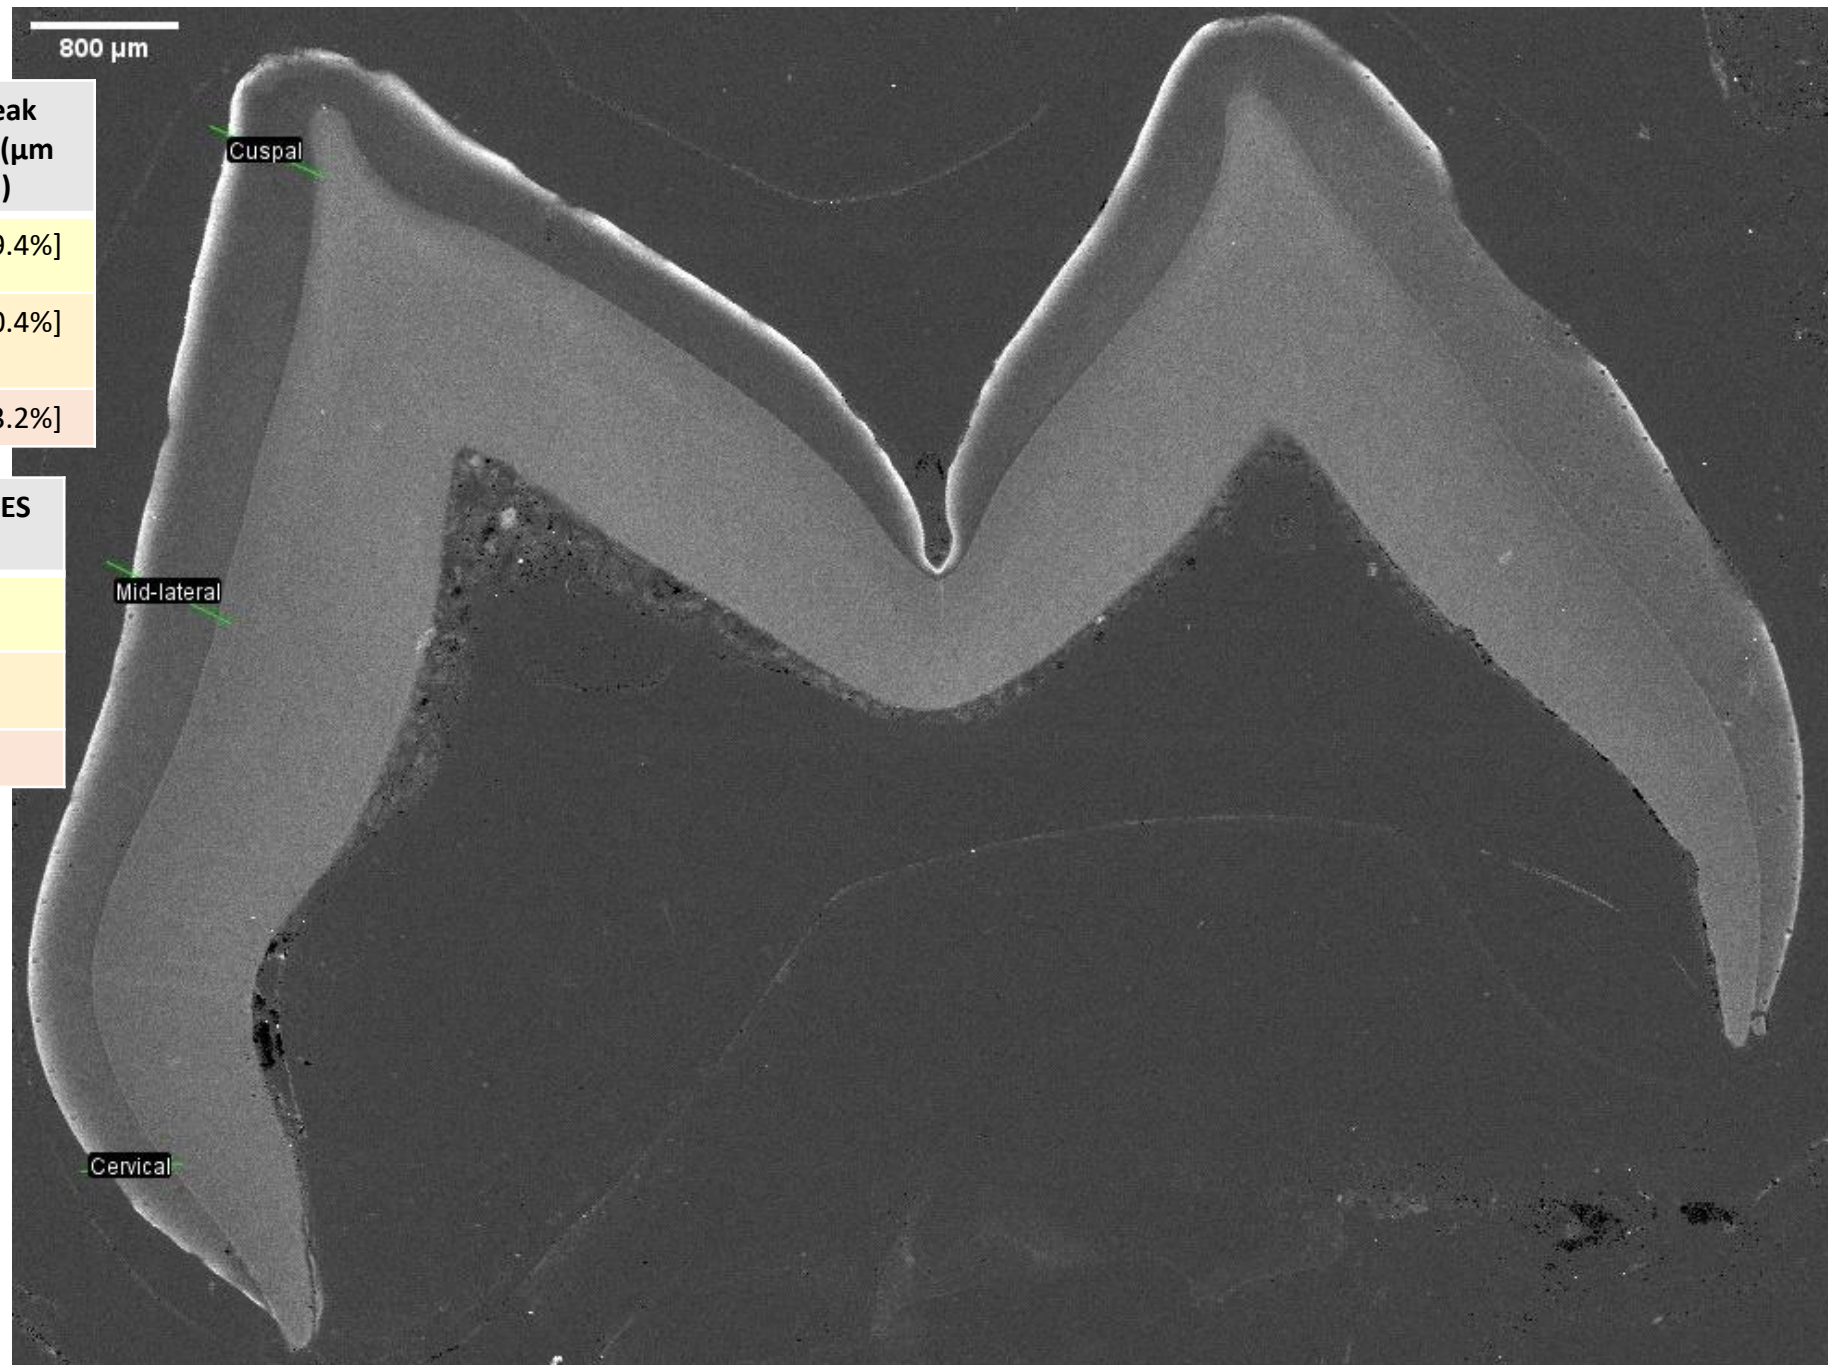

|             | Enamel thickness [ $\mu\text{m}$ ] | Zn peak (ppm) | Zn peak width ( $\mu\text{m}$ [%]) |
|-------------|------------------------------------|---------------|------------------------------------|
| Cuspal      | 450                                | 1192          | 190 [42.2%]                        |
| Mid-lateral | 290                                | 1147          | 170 [58.6%]                        |
| Cervical    | 170                                | 744           | 150 [88.2%]                        |

|             | "Take-off" to Zn peak ( $\mu\text{m}$ [%]) | Zn peak to OES ( $\mu\text{m}$ [%]) |
|-------------|--------------------------------------------|-------------------------------------|
| Cuspal      | 140 [31.1%]                                | 50 [11.1%]                          |
| Mid-lateral | 120 [41.4%]                                | 50 [17.2%]                          |
| Cervical    | 110 [64.7%]                                | 40 [23.5%]                          |

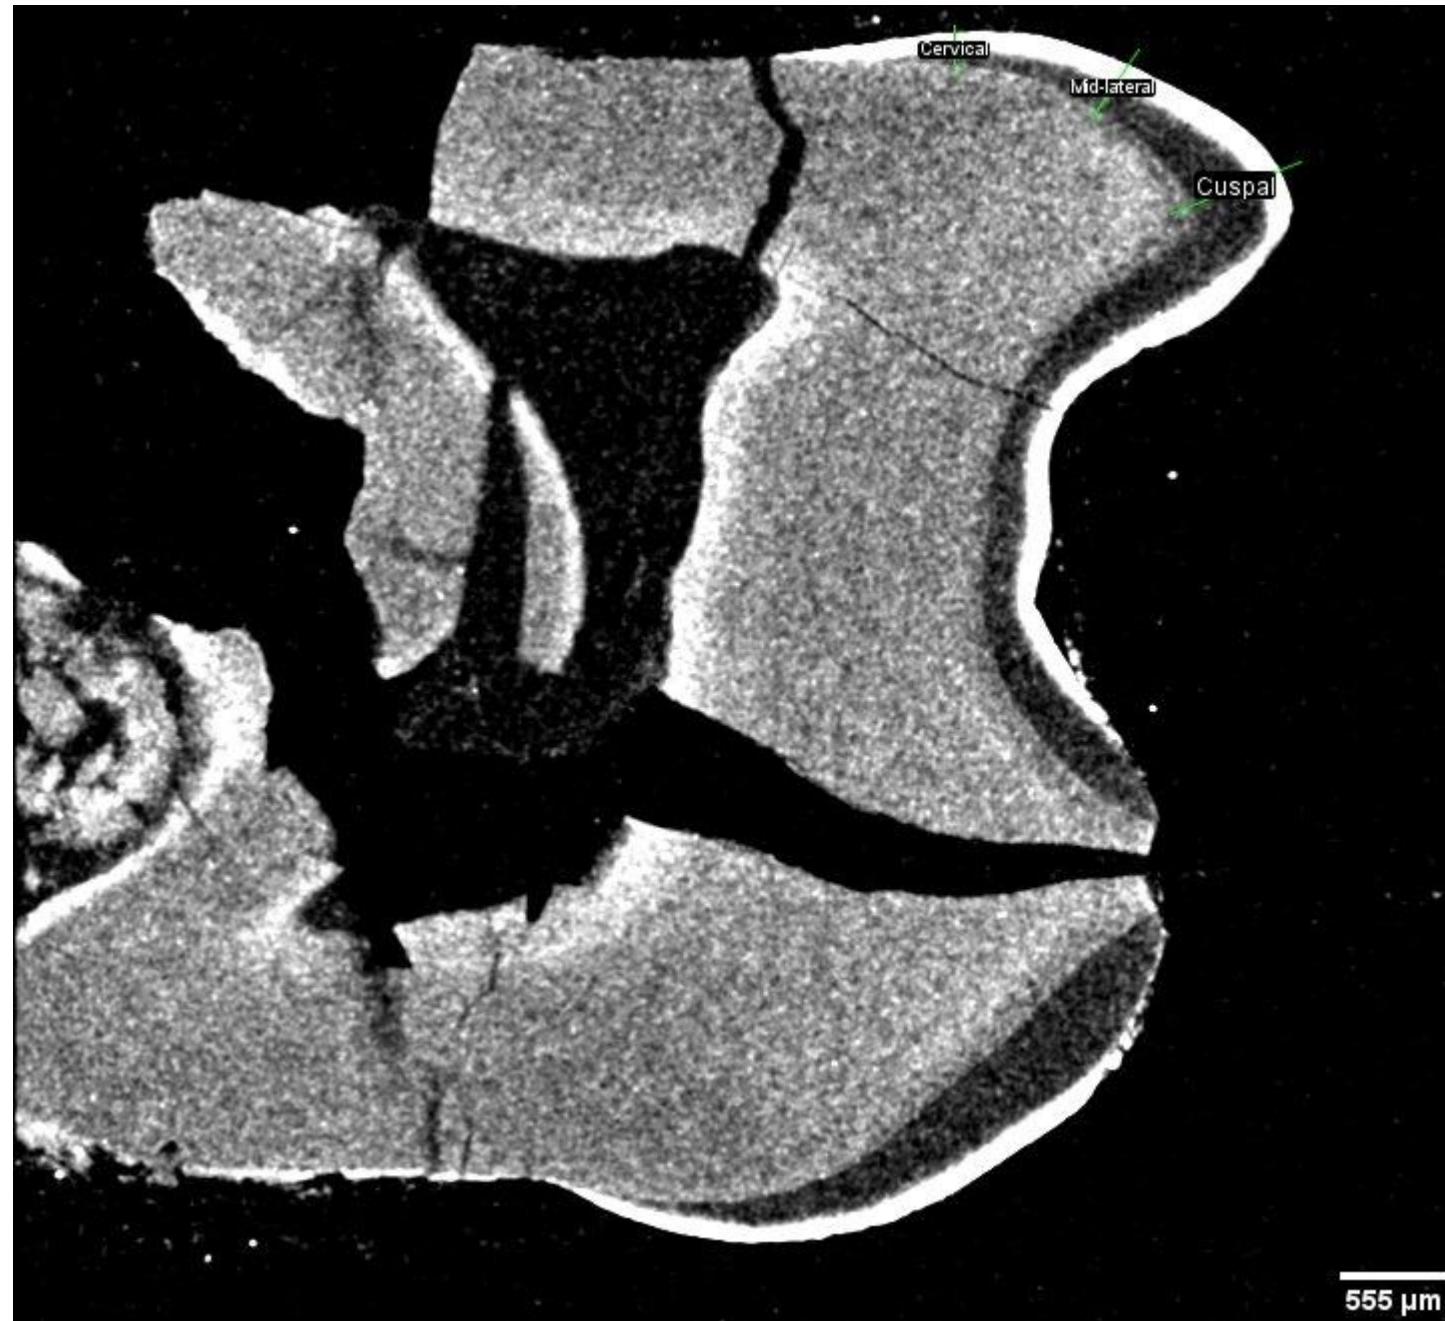



|             | Enamel thickness [ $\mu\text{m}$ ] | Zn peak (ppm) | Zn peak width ( $\mu\text{m}$ [%]) |
|-------------|------------------------------------|---------------|------------------------------------|
| Cuspal      | 1755                               | 885           | 645 [36.8%]                        |
| Mid-lateral | 1395                               | 667           | 600 [43.0%]                        |
| Cervical    | 570                                | 536           | 480 [84.2%]                        |

|             | "Take-off" to Zn peak ( $\mu\text{m}$ [%]) | Zn peak to OES ( $\mu\text{m}$ [%]) |
|-------------|--------------------------------------------|-------------------------------------|
| Cuspal      | 585 [33.3%]                                | 60 [3.4%]                           |
| Mid-lateral | 555 [39.8%]                                | 45 [3.2%]                           |
| Cervical    | 420 [73.7%]                                | 60 [10.5%]                          |

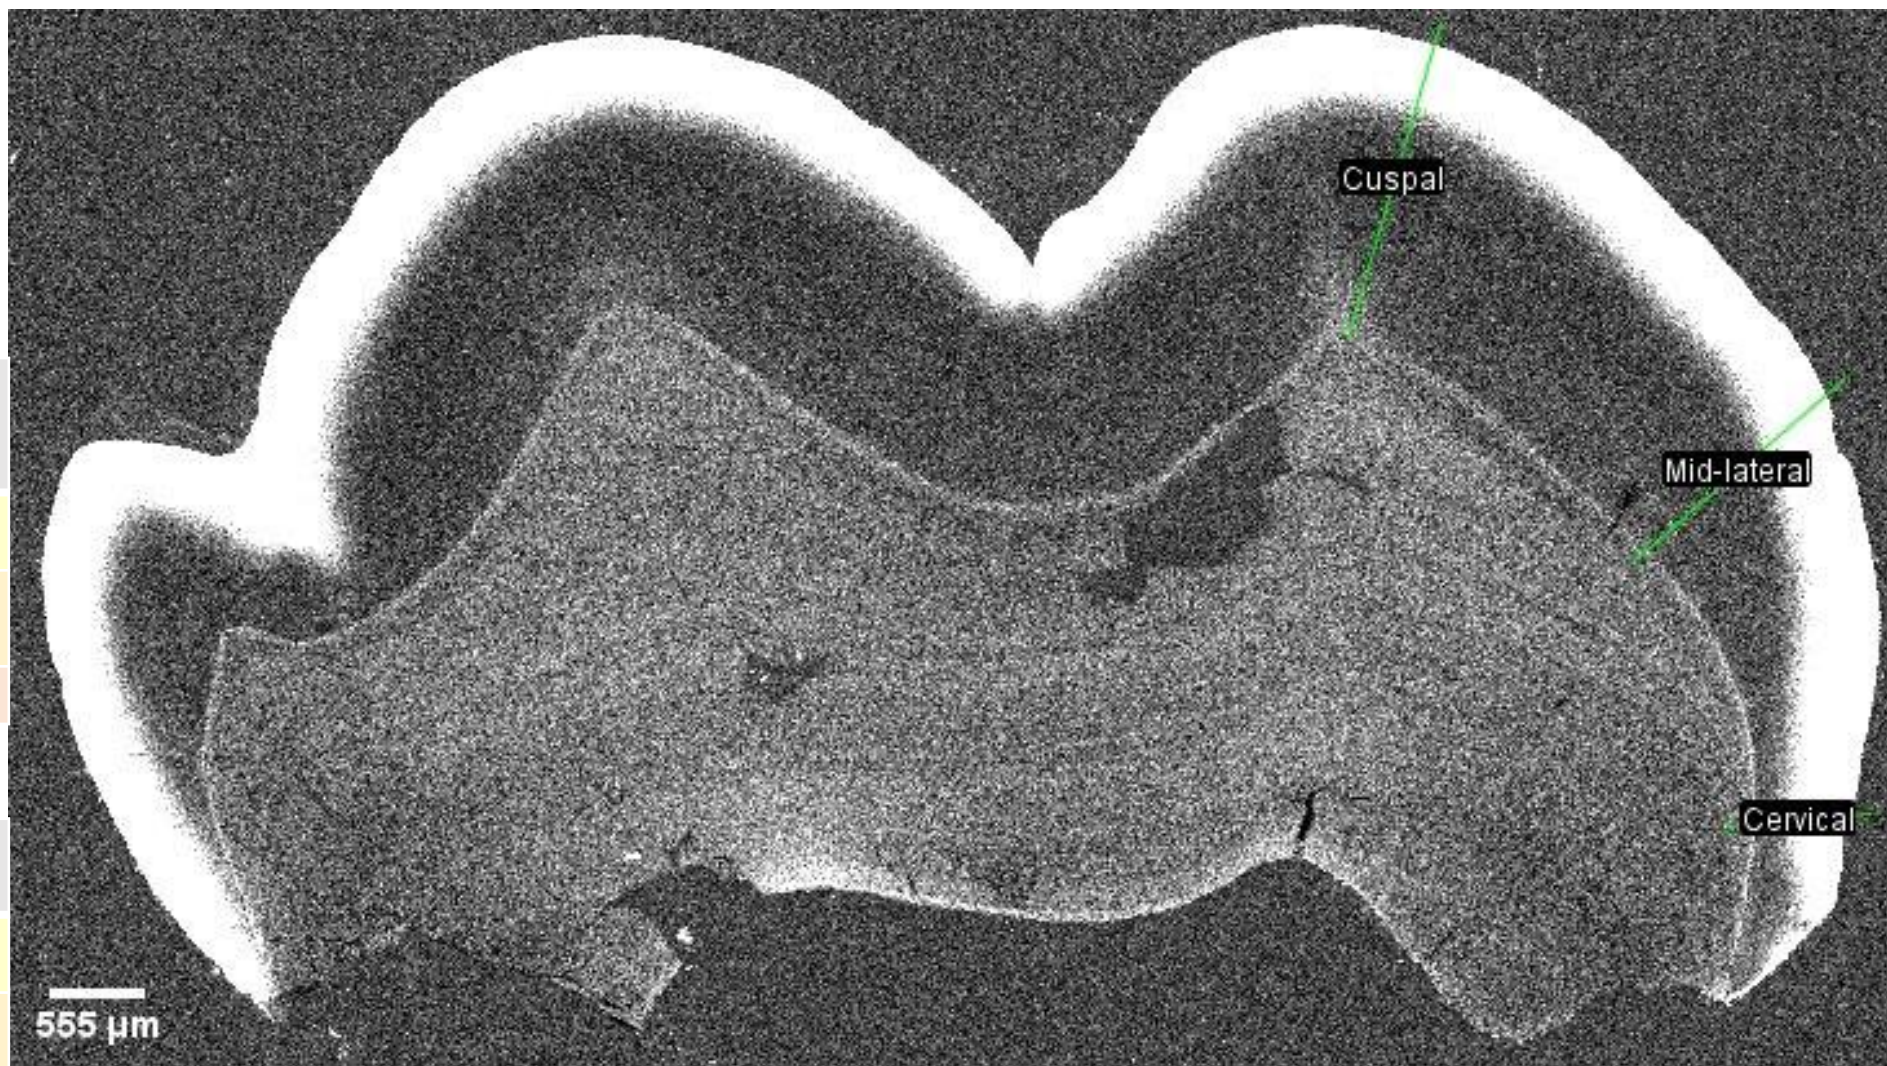

|             | Enamel thickness [ $\mu\text{m}$ ] | Zn peak (ppm) | Zn peak width ( $\mu\text{m}$ [%]) |
|-------------|------------------------------------|---------------|------------------------------------|
| Cuspal      | 660                                | 1241          | 260 [39.4%]                        |
| Mid-lateral | 860                                | 1253          | 380 [44.2%]                        |
| Cervical    | 280                                | 706           | 220 [89.3%]                        |

|             | "Take-off" to Zn peak ( $\mu\text{m}$ [%]) | Zn peak to OES ( $\mu\text{m}$ [%]) |
|-------------|--------------------------------------------|-------------------------------------|
| Cuspal      | 220 [33.3%]                                | 40 [6.1%]                           |
| Mid-lateral | 320 [37.2%]                                | 60 [7.0%]                           |
| Cervical    | 200 [71.4%]                                | 50 [17.9%]                          |

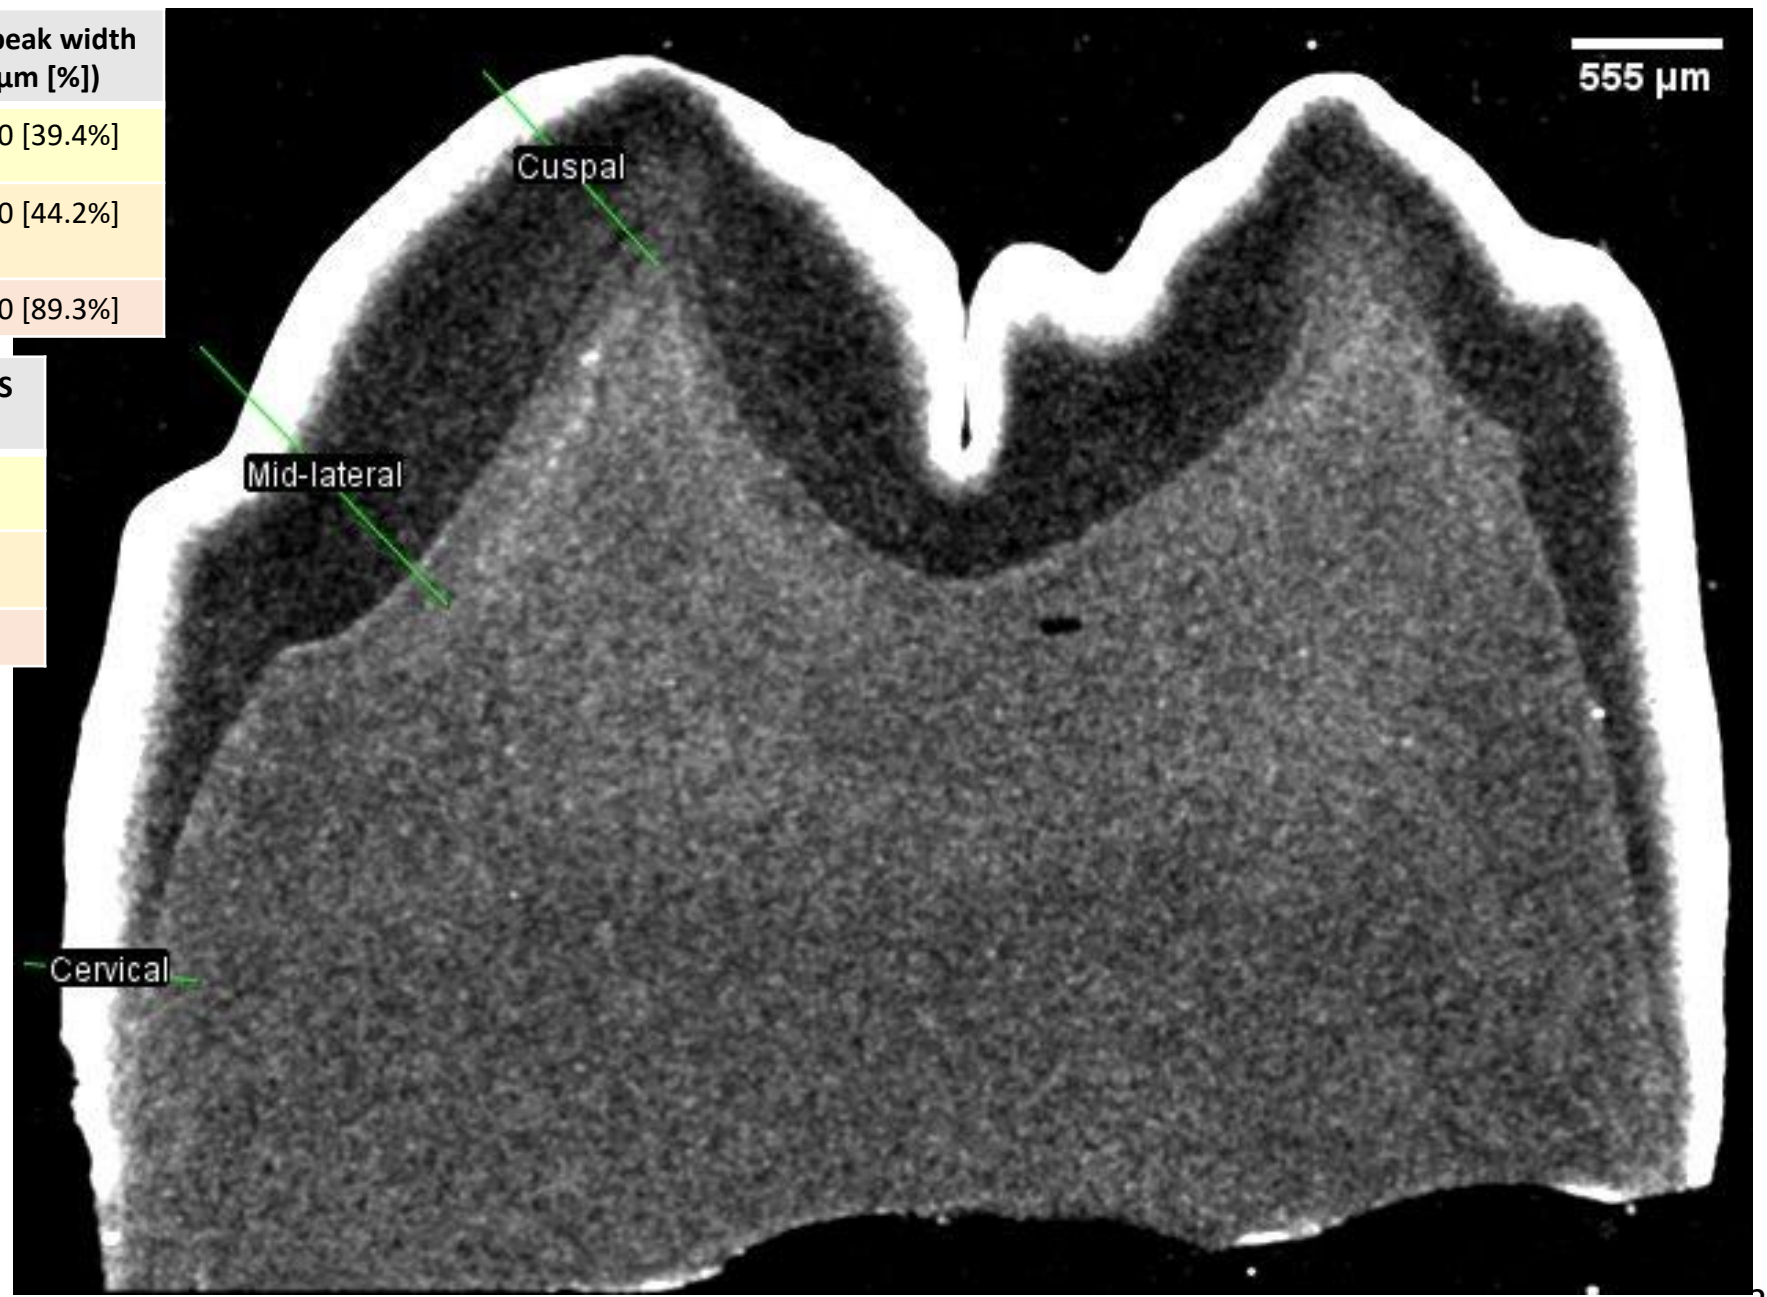

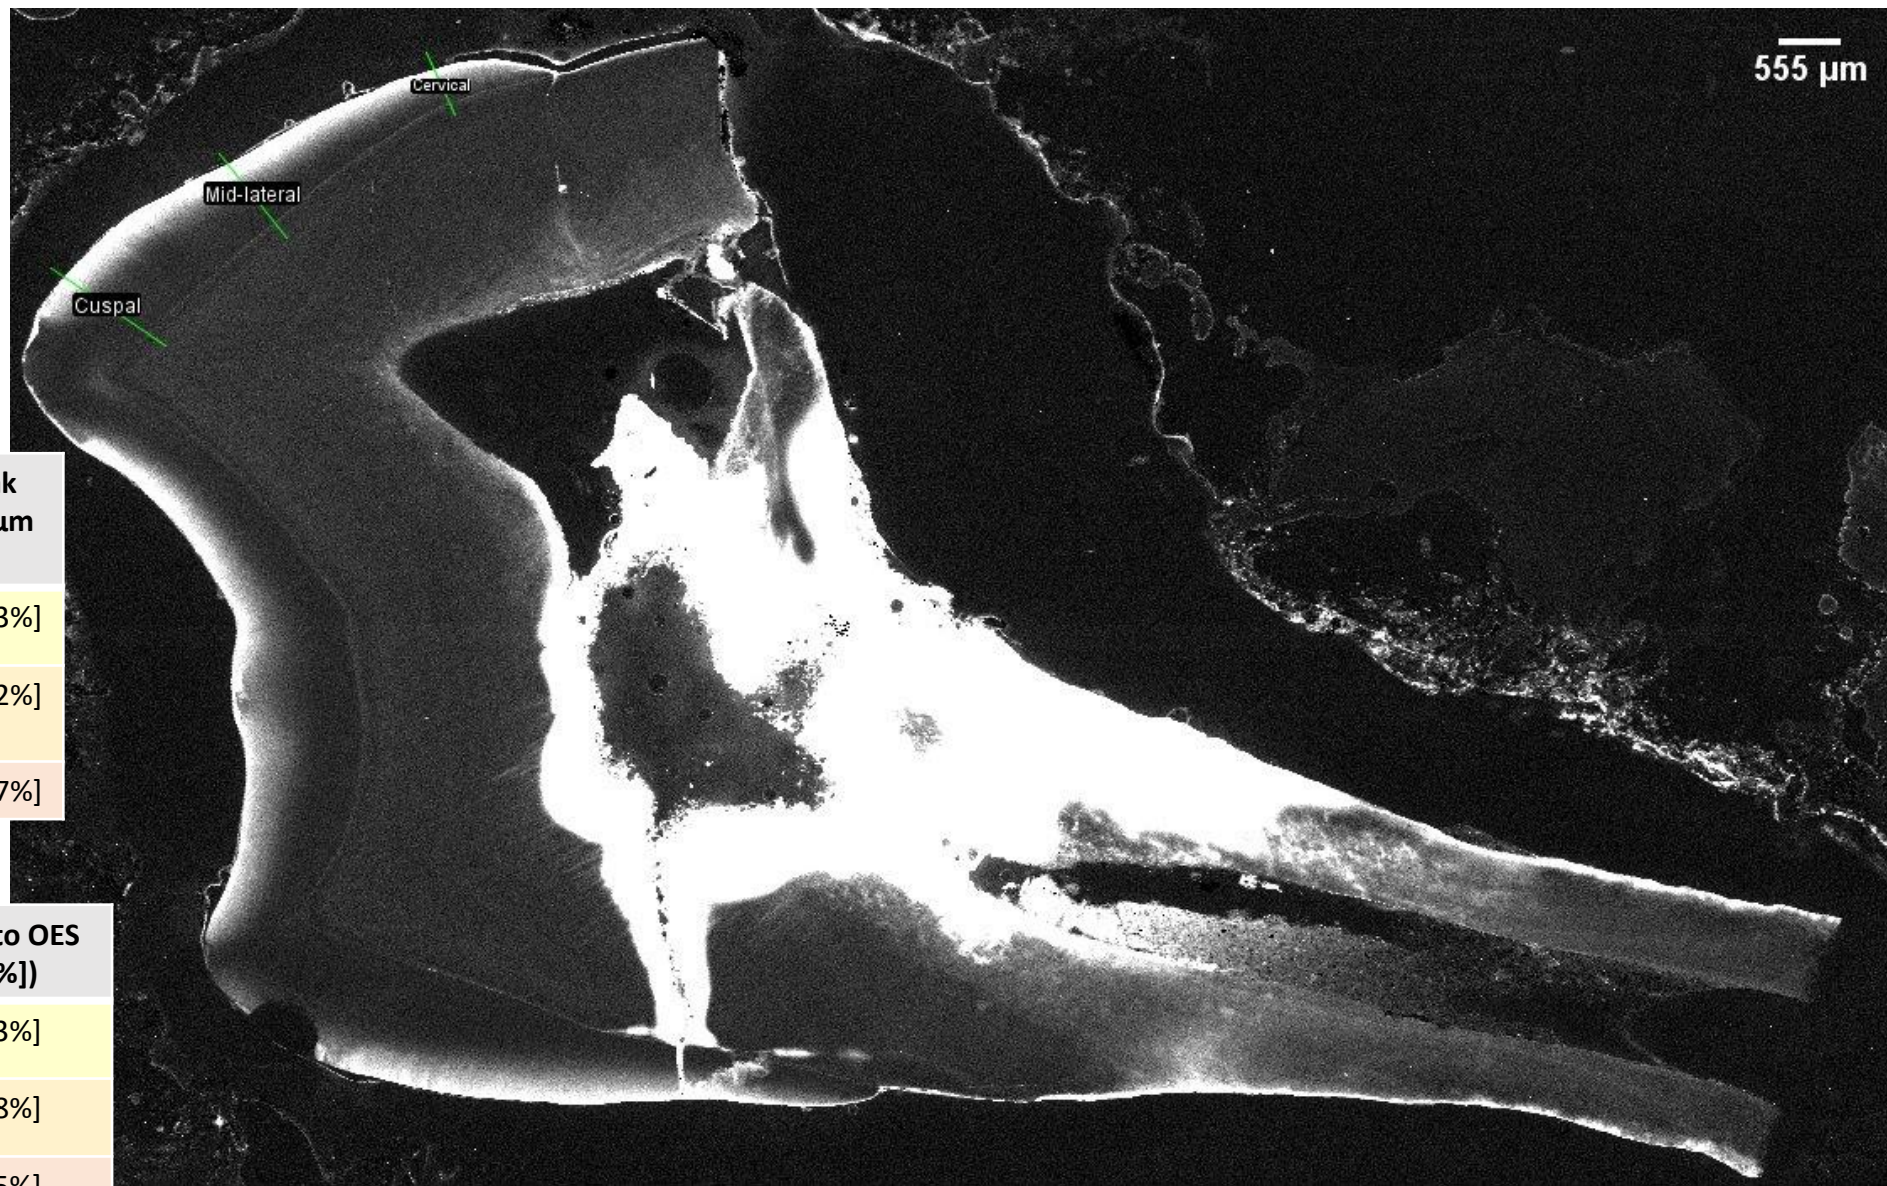

|             | Enamel thickness [ $\mu\text{m}$ ] | Zn peak (ppm) | Zn peak width ( $\mu\text{m}$ [%]) |
|-------------|------------------------------------|---------------|------------------------------------|
| Cuspal      | 900                                | 971           | 525 [58.3%]                        |
| Mid-lateral | 660                                | 995           | 450 [68.2%]                        |
| Cervical    | 315                                | 739           | 270 [85.7%]                        |

|             | "Take-off" to Zn peak ( $\mu\text{m}$ [%]) | Zn peak to OES ( $\mu\text{m}$ [%]) |
|-------------|--------------------------------------------|-------------------------------------|
| Cuspal      | 495 [55%]                                  | 30 [3.3%]                           |
| Mid-lateral | 405 [61.4%]                                | 45 [6.8%]                           |
| Cervical    | 240 [76.2%]                                | 30 [9.5%]                           |

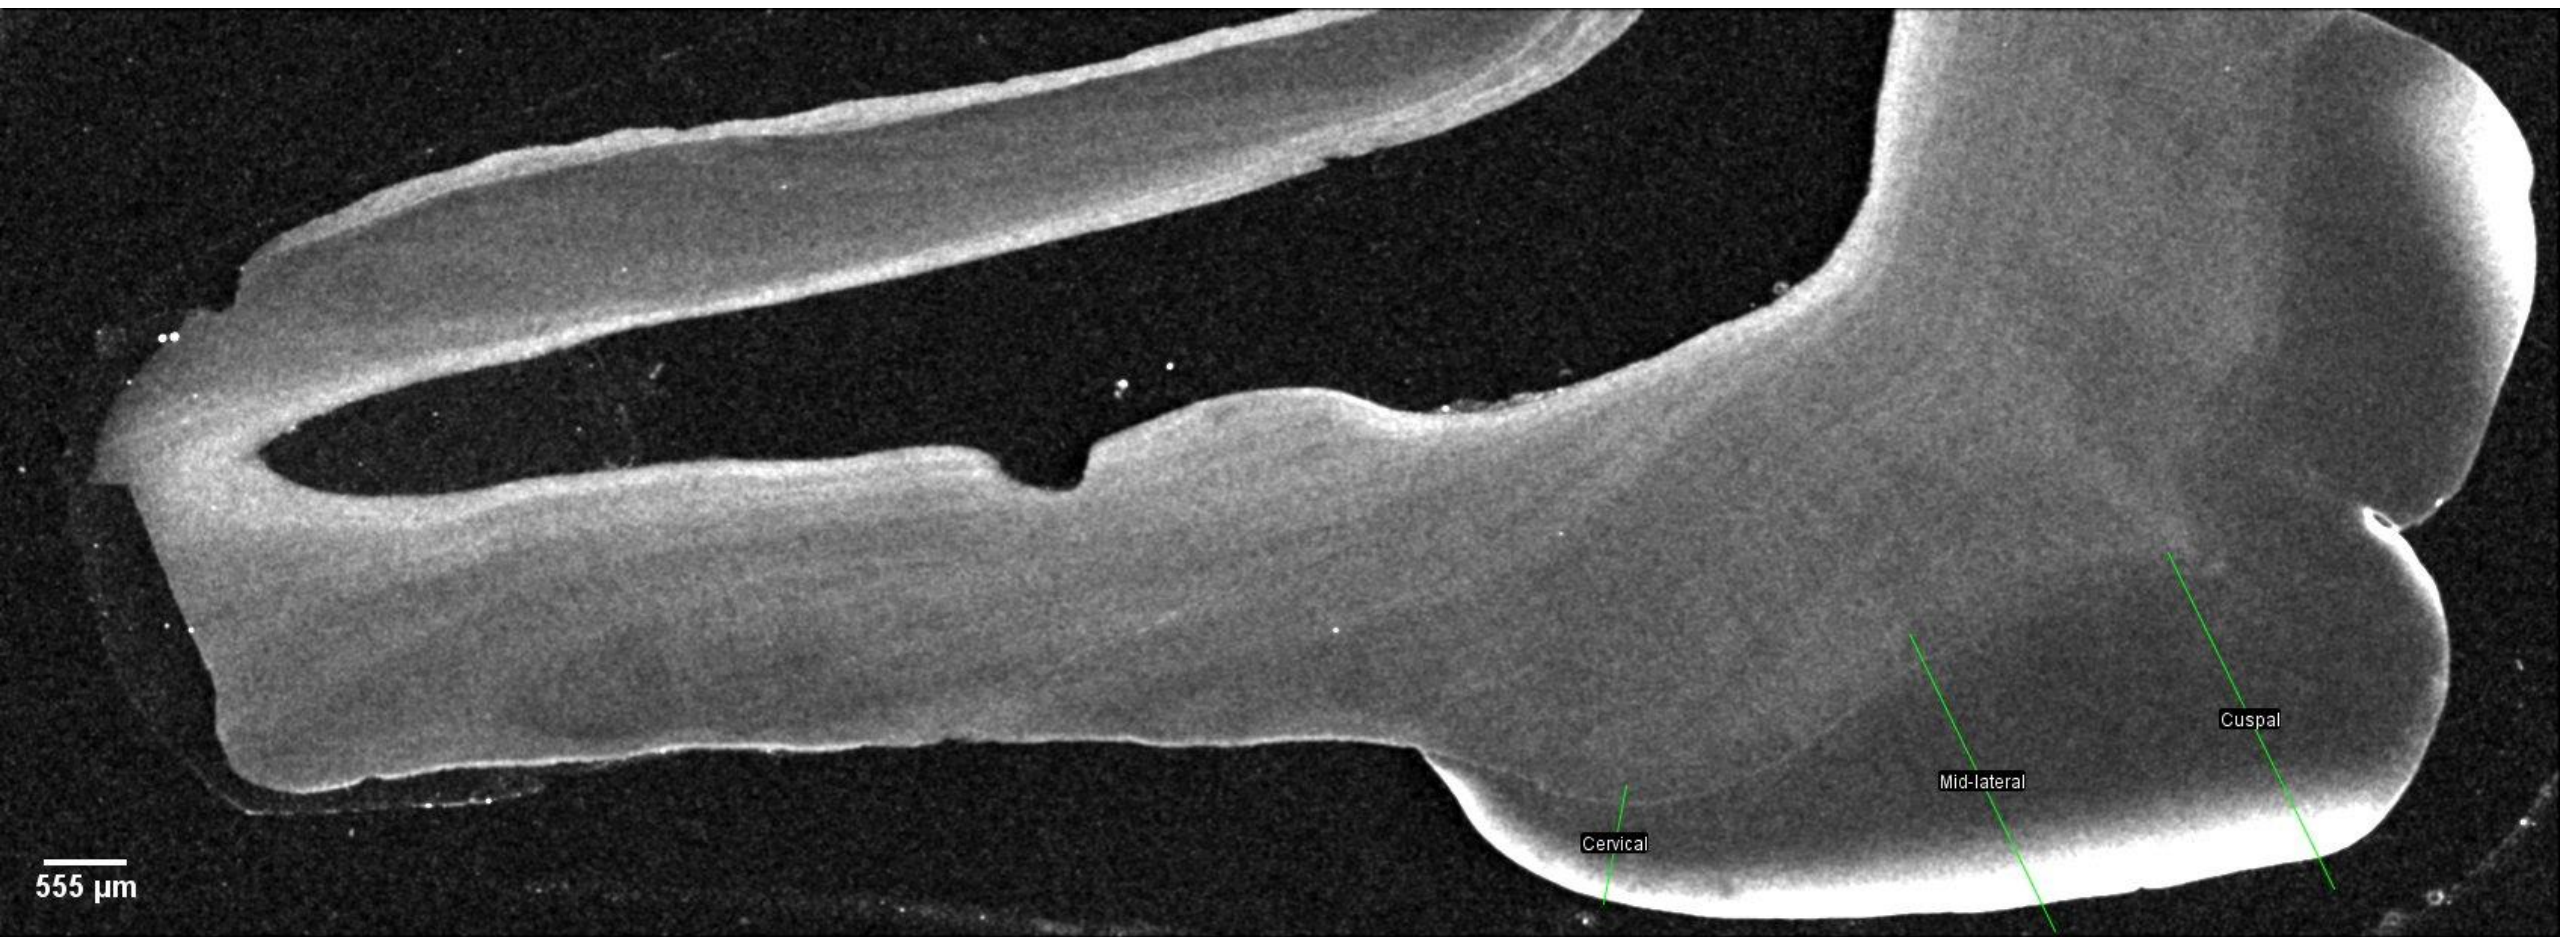

|                    | Enamel thickness [ $\mu\text{m}$ ] | Zn peak (ppm) | Zn peak width ( $\mu\text{m}$ [%]) | "Take-off" to Zn peak ( $\mu\text{m}$ [%]) | Zn peak to OES ( $\mu\text{m}$ [%]) |
|--------------------|------------------------------------|---------------|------------------------------------|--------------------------------------------|-------------------------------------|
| <b>Cuspal</b>      | 2150                               | 544           | 750 [34.9%]                        | 670 [31.2%]                                | 80 [3.7%]                           |
| <b>Mid-lateral</b> | 1770                               | 506           | 720 [40.7%]                        | 650 [36.7%]                                | 70 [4%]                             |
| <b>Cervical</b>    | 650                                | 393           | 330 [50.8%]                        | 280 [43.1%]                                | 50 [7.7%]                           |

|             | Enamel thickness [ $\mu\text{m}$ ] | Zn peak (ppm) | Zn peak width ( $\mu\text{m}$ [%]) |
|-------------|------------------------------------|---------------|------------------------------------|
| Cuspal      | 2820                               | 879           | 950 [33.7%]                        |
| Mid-lateral | 1970                               | 1000          | 950 [48.2%]                        |
| Cervical    | 690                                | 1506          | 560 [81.2%]                        |

|             | "Take-off" to Zn peak ( $\mu\text{m}$ [%]) | Zn peak to OES ( $\mu\text{m}$ [%]) |
|-------------|--------------------------------------------|-------------------------------------|
| Cuspal      | 930 [32.6%]                                | 30 [1.1%]                           |
| Mid-lateral | 900 [45.7%]                                | 50 [2.5%]                           |
| Cervical    | 540 [78.3%]                                | 20 [2.9%]                           |

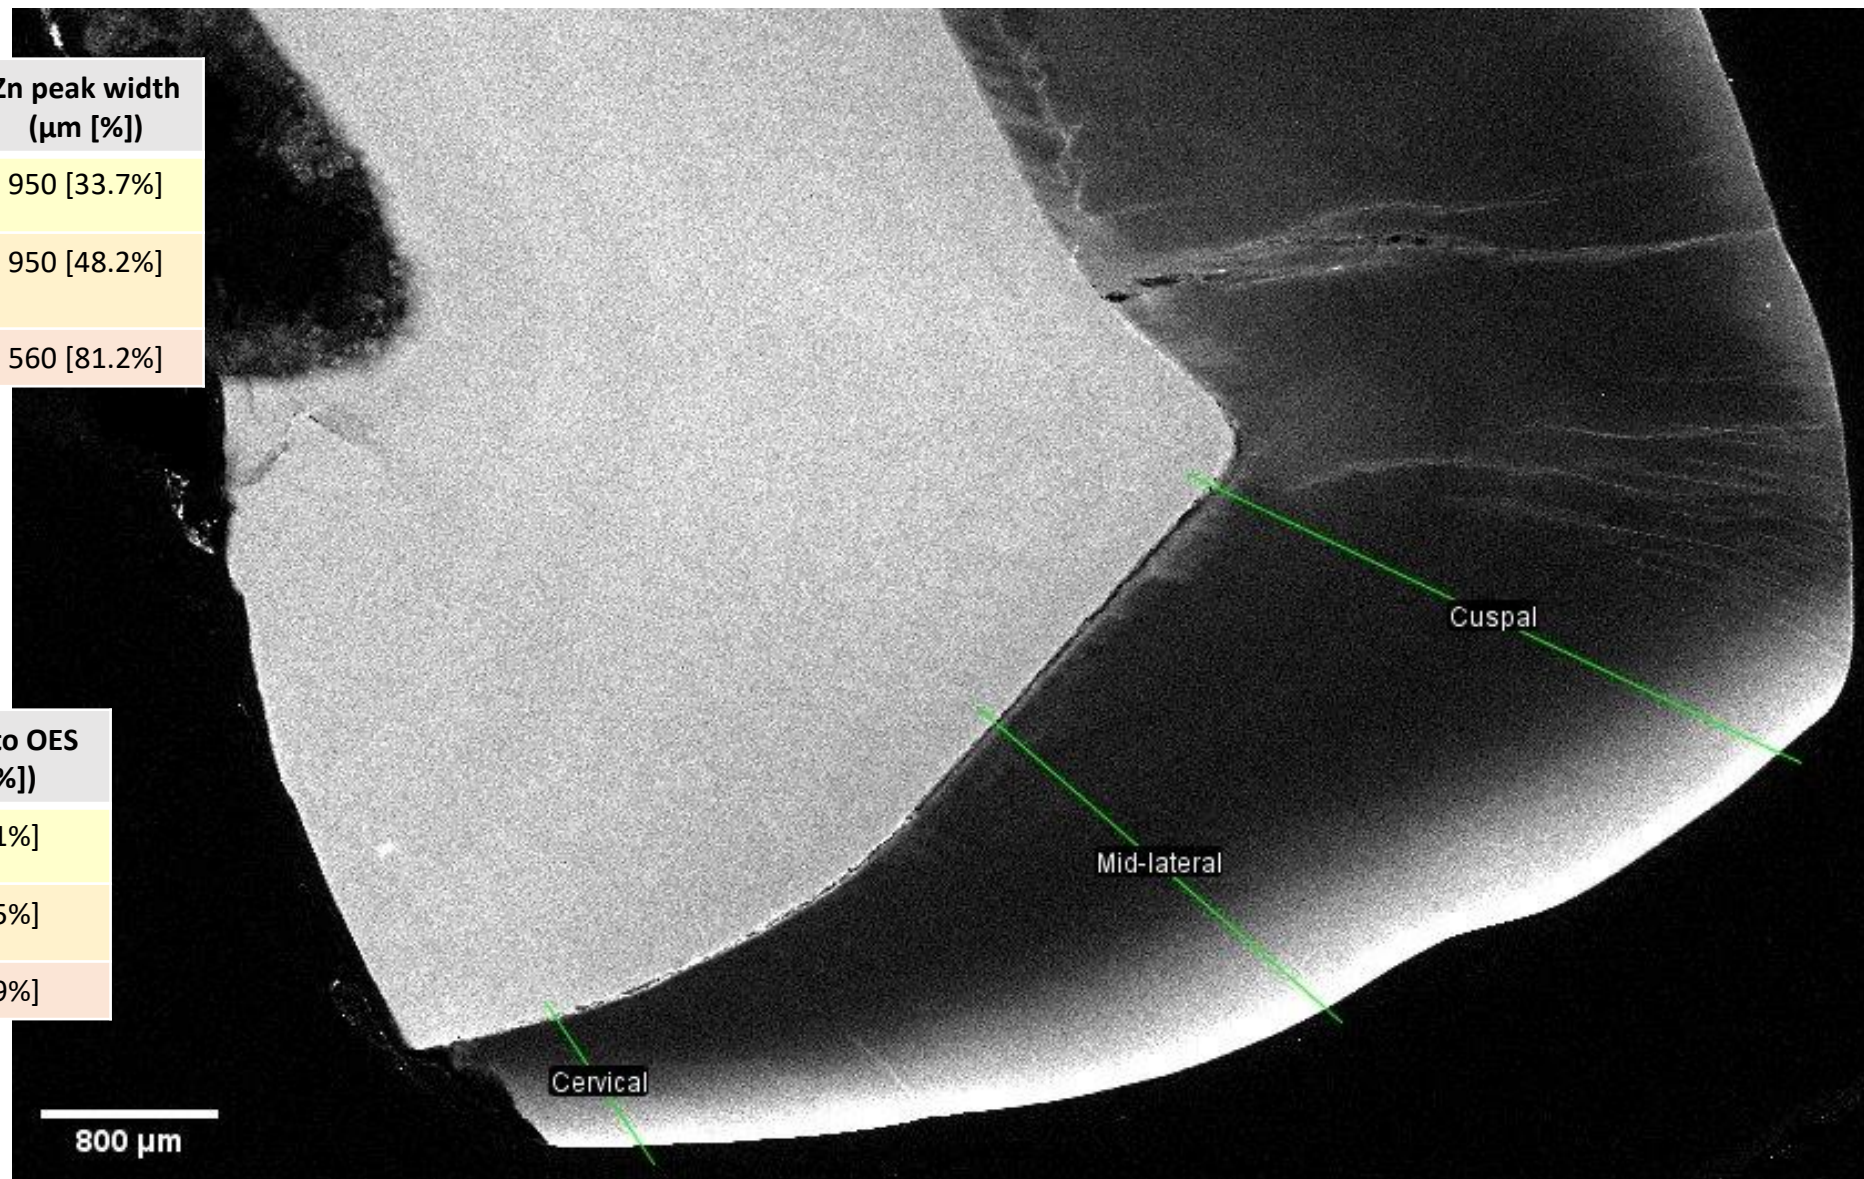

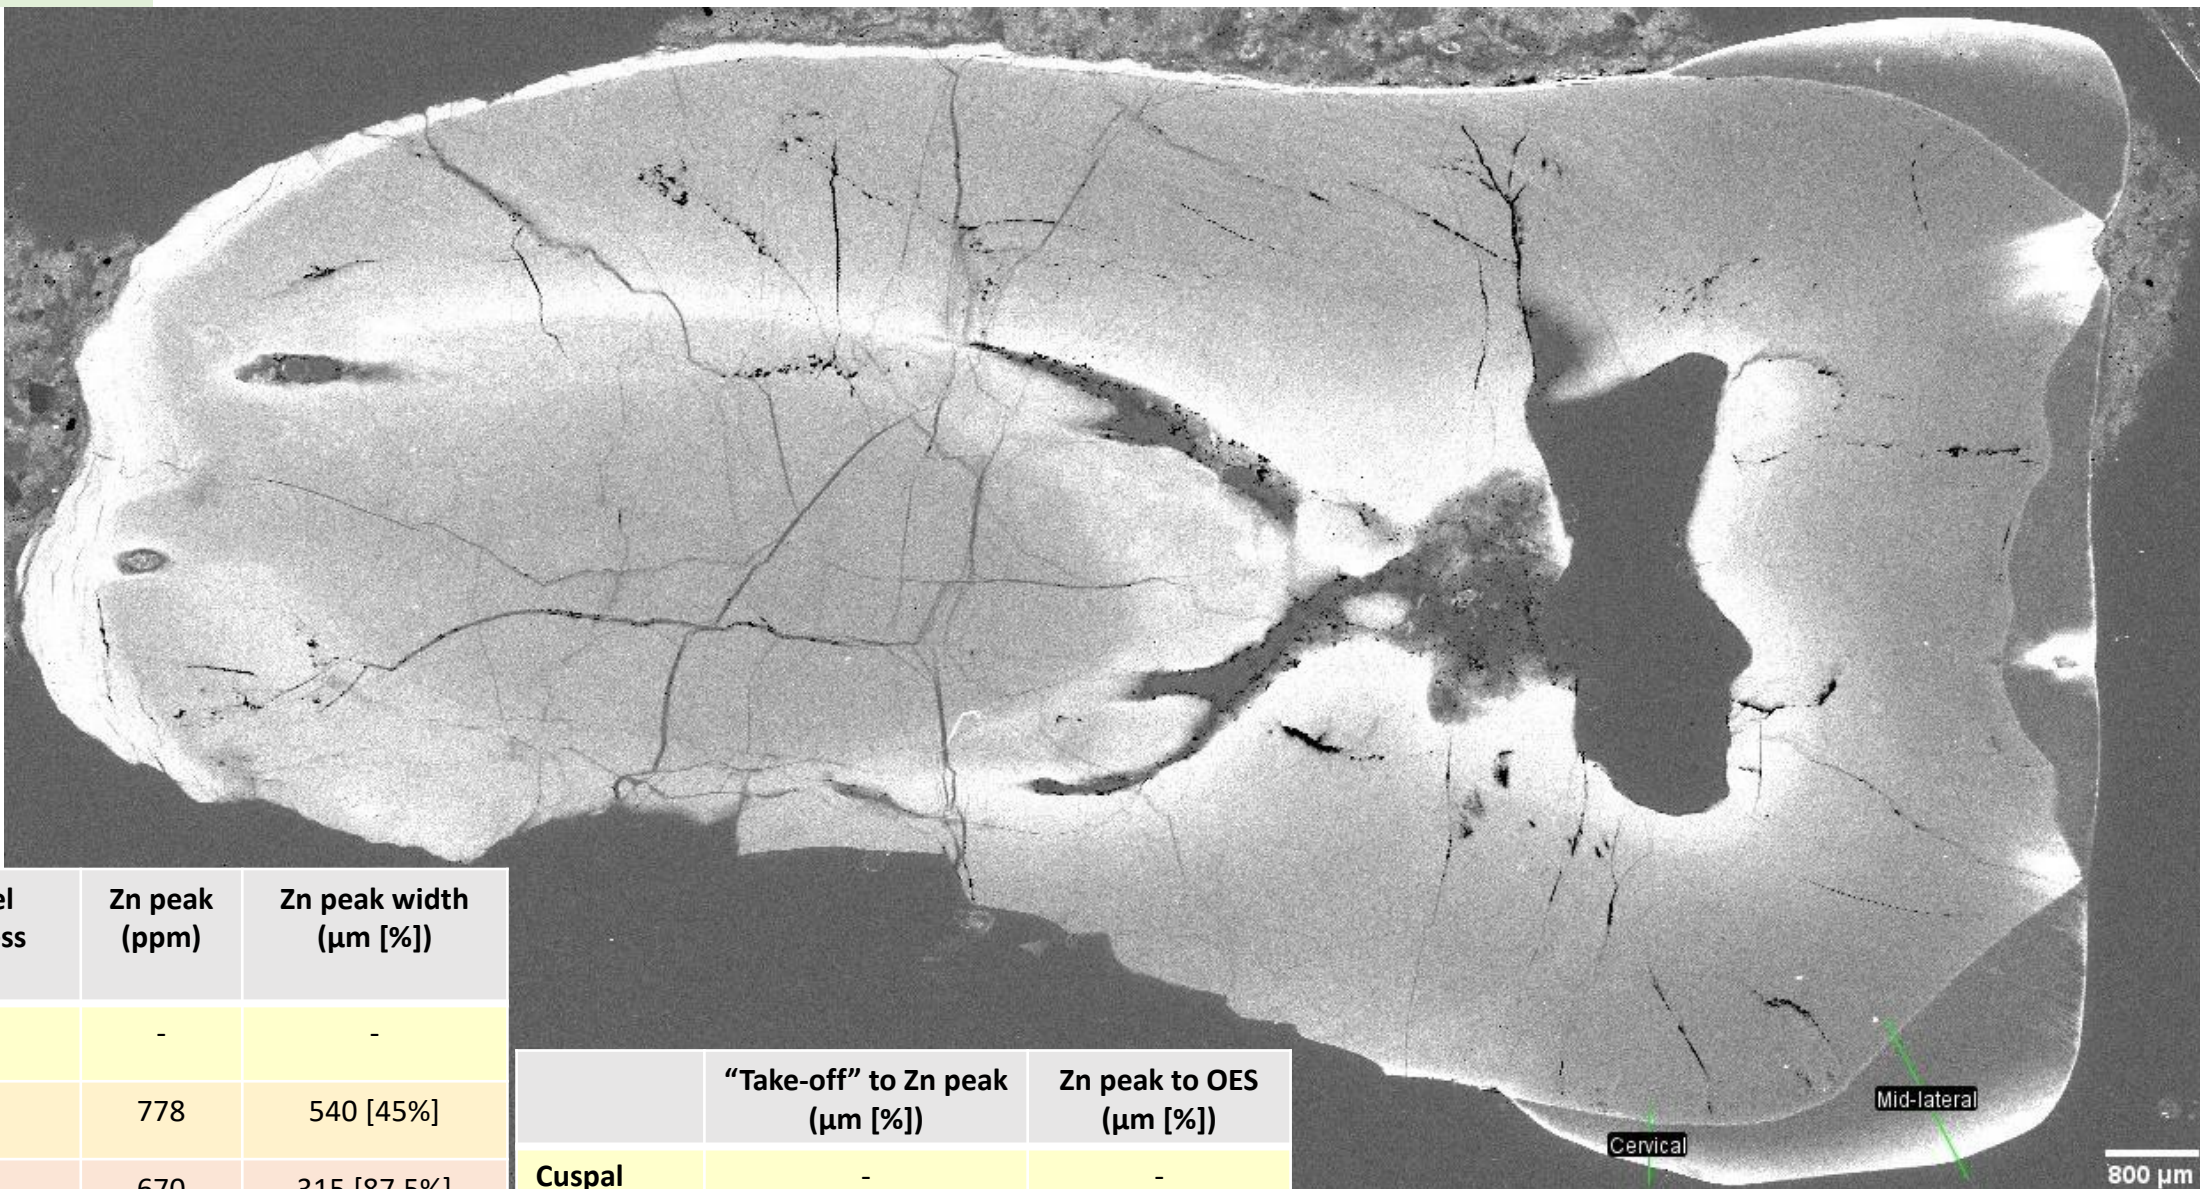

|                    | Enamel thickness [ $\mu\text{m}$ ] | Zn peak (ppm) | Zn peak width ( $\mu\text{m}$ [%]) |
|--------------------|------------------------------------|---------------|------------------------------------|
| <b>Cuspal</b>      | Worn                               | -             | -                                  |
| <b>Mid-lateral</b> | 1200                               | 778           | 540 [45%]                          |
| <b>Cervical</b>    | 360                                | 670           | 315 [87.5%]                        |

|                    | "Take-off" to Zn peak ( $\mu\text{m}$ [%]) | Zn peak to OES ( $\mu\text{m}$ [%]) |
|--------------------|--------------------------------------------|-------------------------------------|
| <b>Cuspal</b>      | -                                          | -                                   |
| <b>Mid-lateral</b> | 495 [41.3%]                                | 45 [3.8%]                           |
| <b>Cervical</b>    | 285 [79.2%]                                | 30 [8.3%]                           |
